# Supplementary material for: Highly efficient and facile alkylation of 4H-cyclopenta-[2,1-b:3,4-b′]dithiophene in water
Source: Royal Society of Chemistry journal article supplement (doi:10.1039/c4ra08119f), 2014-01-01
Supplement: c4ra08119f1.pdf [file c4ra08119f1.pdf]

## Electronic Supplementary Information

### Highly Efficient and Facile Alkylation of 4*H*-Cyclopenta [2,1-*b*:3,4-*b'*] dithiophene in Water

Telugu Bhim Raju,<sup>1</sup> Peddaboodi Gopikrishna,<sup>2</sup> Parameswar Krishnan Iyer<sup>1,2\*</sup>

*Department of Chemistry, Indian Institute of Technology Guwahati, Guwahati-781039, India*  
*Center for Nanotechnology, Indian Institute of Technology Guwahati, Guwahati-781039, Assam, India*

CORRESPONDING AUTHOR: \*Parameswar K. Iyer, Department of Chemistry, Indian Institute of Technology Guwahati, Guwahati-781039. INDIA.

AUTHOR EMAIL ADDRESS: [pki@iitg.ernet.in](mailto:pki@iitg.ernet.in)

AUTHOR FAX: +91 361 258 2349

#### Table of contents

|                                                                                                                                                         |         |
|---------------------------------------------------------------------------------------------------------------------------------------------------------|---------|
| 1. 4,4'-Dialkyl-4 <i>H</i> -cyclopenta[2,1- <i>b</i> :3,4- <i>b'</i> ]dithiophene<br>NMR( <sup>1</sup> H, <sup>13</sup> C) and HRMS spectra             | S2-S13  |
| 2. 2,6-Dibromo-4,4'-Dialkyl-4 <i>H</i> -cyclopenta[2,1- <i>b</i> :3,4- <i>b'</i> ]dithiophene<br>NMR( <sup>1</sup> H, <sup>13</sup> C) and HRMS spectra | S14-S25 |
| 3. 2,6-Dibromo spiro[4,5] ([2,1- <i>b</i> ; 3,4- <i>b'</i> ]dithieno)decane<br>NMR ( <sup>1</sup> H, <sup>13</sup> C) and Crystal data                  | S25-S26 |

TBR-CPDT-C6

Sample Name:  
TBR-CPDT-C6  
Data Collected on:  
IITG-NMR-mercury400  
Archive directory:  
/home/chem/data/study  
Sample directory:  
FICHYDRA-ZH-tit-4-01  
FidFile: TBR-CPDT-C6  
Pulse Sequence: PROTON (s2pul)  
Solvent: cdcl3  
Data collected on: Dec 20 2013

Temp. 25.0 C / 298.1 K  
Operator: chem

Relax. delay 1.000 sec  
Pulse 45.0 degrees  
Acq. time 2.561 sec  
Width 6398.0 Hz  
32 repetitions  
OBSERVE H1, 399.8509641 MHz  
DATA PROCESSING  
FT size 32768  
Total time 2 min 12 sec

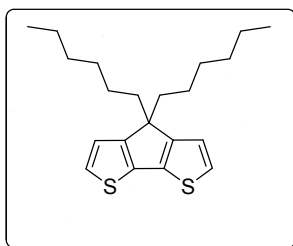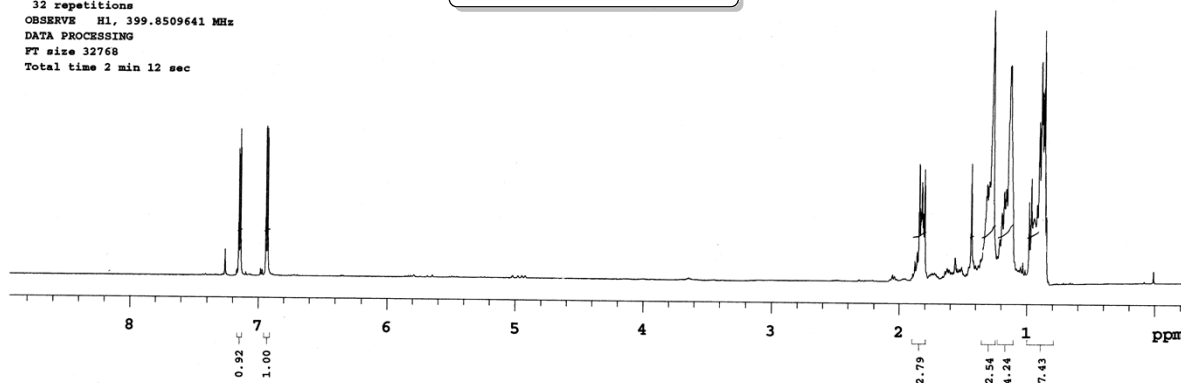

**Figure S1:**  $^1\text{H}$ -NMR spectrum of 4,4'-Dihexyl-4*H*-cyclopenta[2,1-*b*:3,4-*b'*]dithiophene (entry 1a).

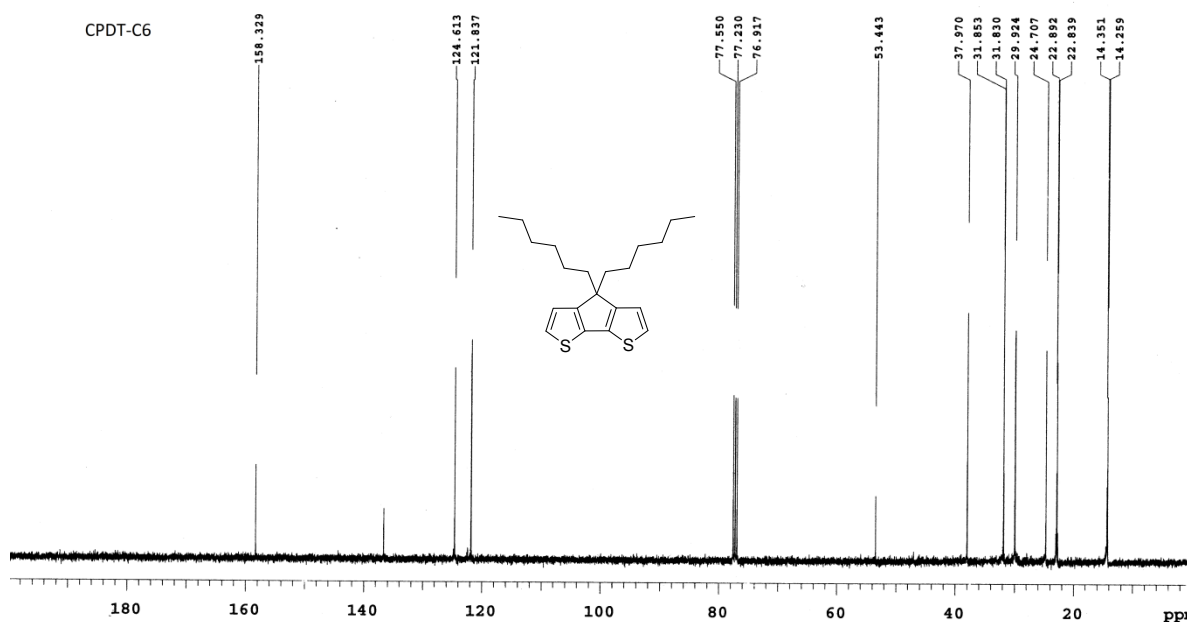

**Figure S2:**  $^{13}\text{C}$ -NMR spectrum of 4,4'-Dihexyl-4*H*-cyclopenta[2,1-*b*:3,4-*b'*]dithiophene (entry 1a).

|               |                  |             |             |                 |                                   |                        |             |
|---------------|------------------|-------------|-------------|-----------------|-----------------------------------|------------------------|-------------|
| Sample Name   | Unavailable      | Position    | Unavailable | Instrument Name | Unavailable                       | User Name              | Unavailable |
| Inj Vol       | Unavailable      | InjPosition | Unavailable | SampleType      | Unavailable                       | IRM Calibration Status | Success     |
| Data Filename | TBR-11-CPDT-C6.d | ACQ Method  |             | Comment         | Sample information is unavailable | Acquired Time          | Unavailable |

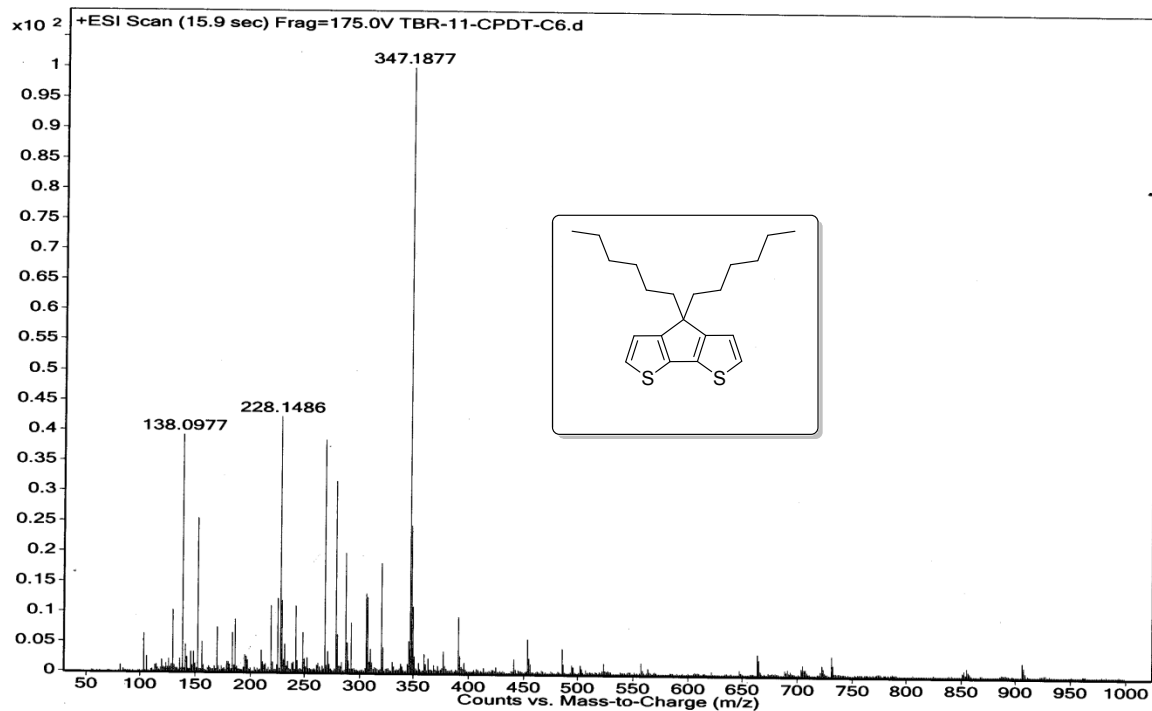

Figure S3: ESI-MS spectrum of 4,4'-Dihexyl-4H-cyclopenta[2,1-b:3,4-b']dithiophene (entry 1a).

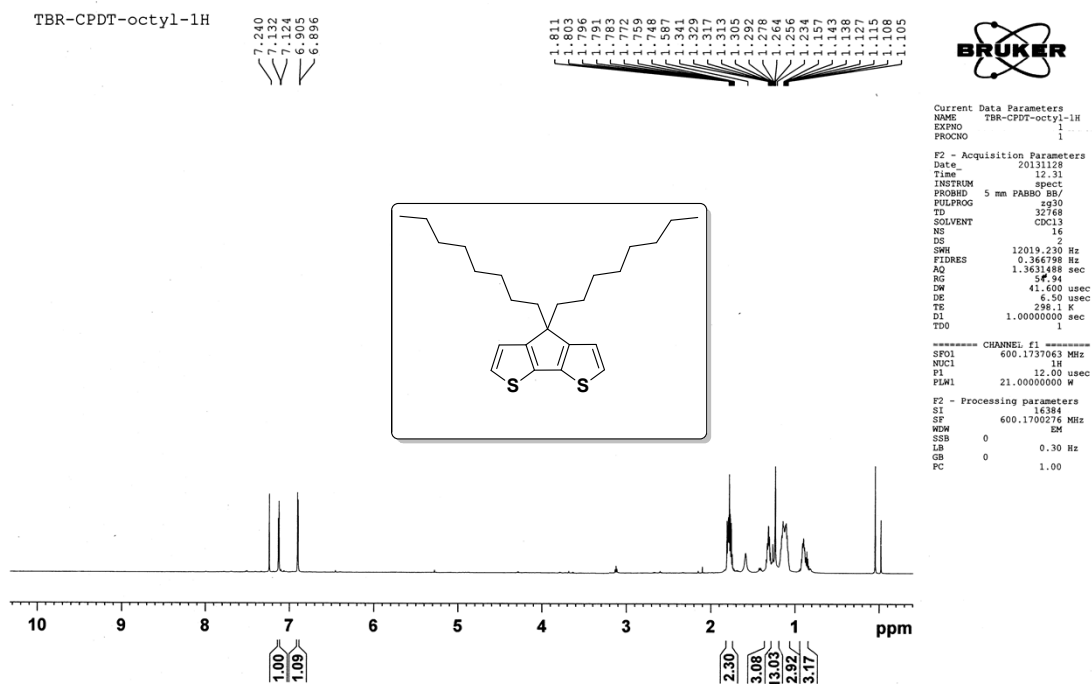

Figure S4: <sup>1</sup>H-NMR spectrum of 4,4'-Dioctyl-4H-cyclopenta[2,1-b:3,4-b']dithiophene (entry 1b).

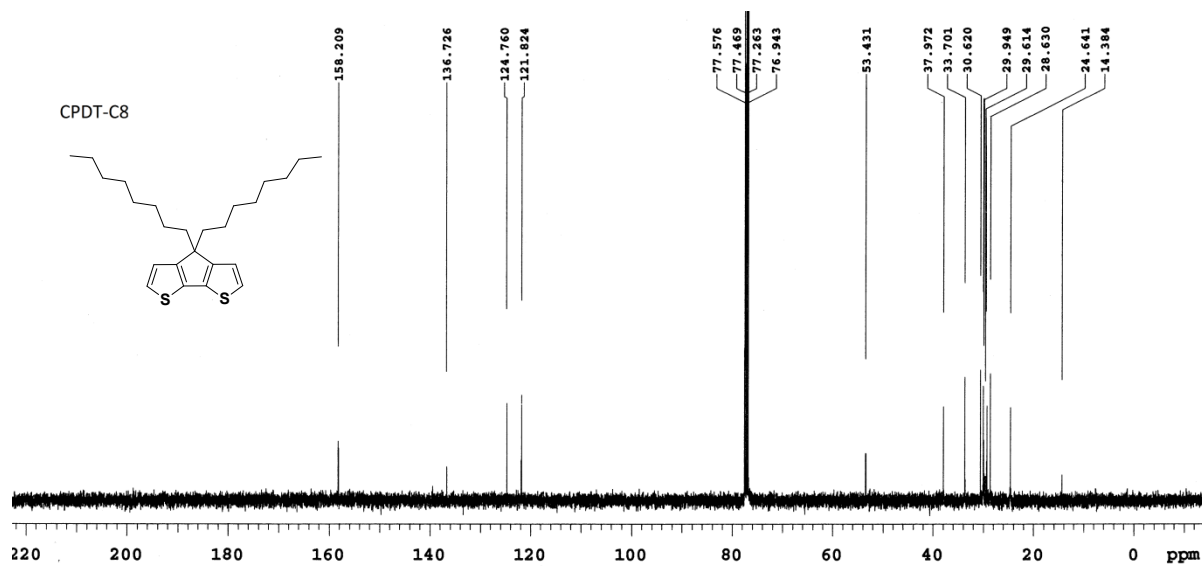

**Figure S5:**  $^{13}\text{C}$  NMR spectrum of 4,4'-Dioctyl-4*H*-cyclopenta[2,1-*b*:3,4-*b'*]dithiophene (entry 1b).

|               |                         |             |    |                 |              |                        |                        |
|---------------|-------------------------|-------------|----|-----------------|--------------|------------------------|------------------------|
| Sample Name   | TBR CPDT-C <sub>8</sub> | Position    | -1 | Instrument Name | Instrument 1 | User Name              |                        |
| Inj Vol       | -10                     | InjPosition |    | SampleType      | Sample       | IRM Calibration Status | Success                |
| Data Filename | TBR CPDT-C <sub>8</sub> | ACQ Method  |    | Comment         |              | Acquired Time          | 11/14/2013 11:37:28 AM |

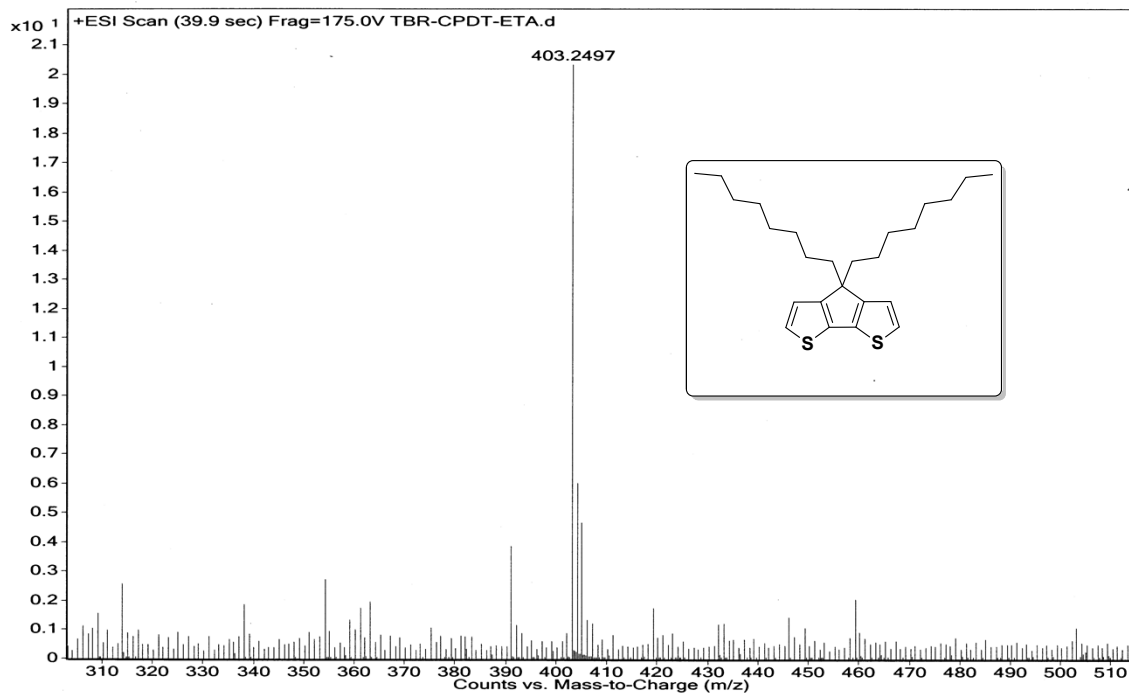

**Figure S6:** ESI-MS spectrum of 4,4'-Dioctyl-4*H*-cyclopenta[2,1-*b*:3,4-*b'*]dithiophene (entry 1b).

TBR\_CPDT\_C10\_H

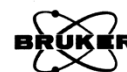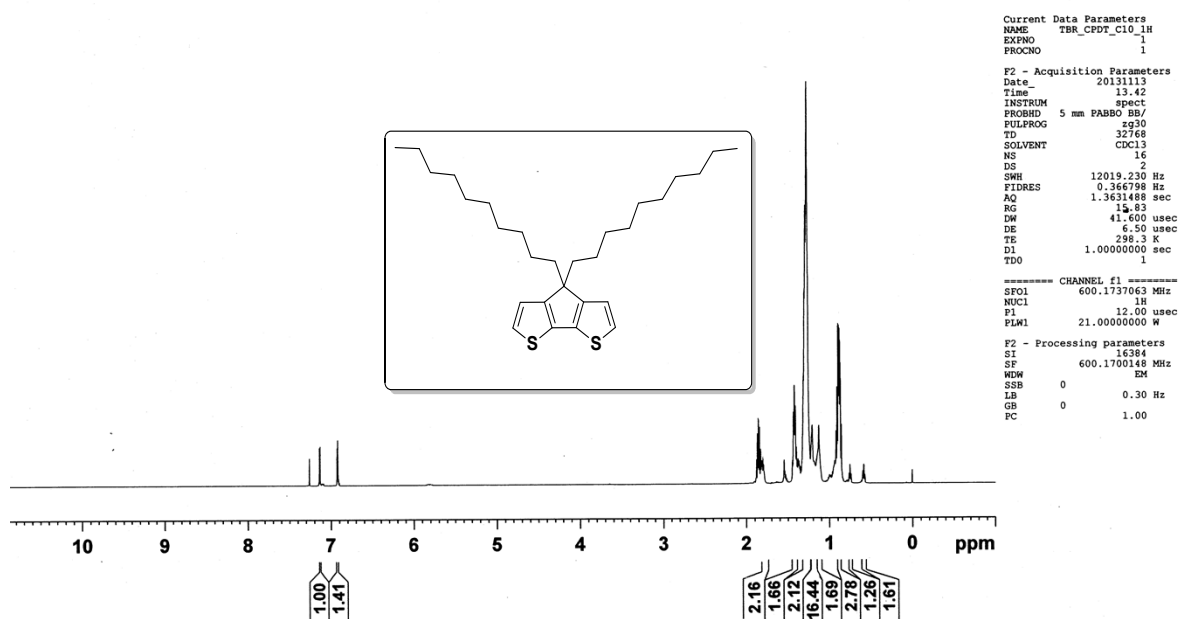

**Figure S7:**  $^1\text{H}$ -NMR spectrum of 4,4'-Bisdecyl-4*H*-cyclopenta[2,1-*b*:3,4-*b'*]dithiophene (entry 1c).

TBR\_CPDT\_C10\_13C

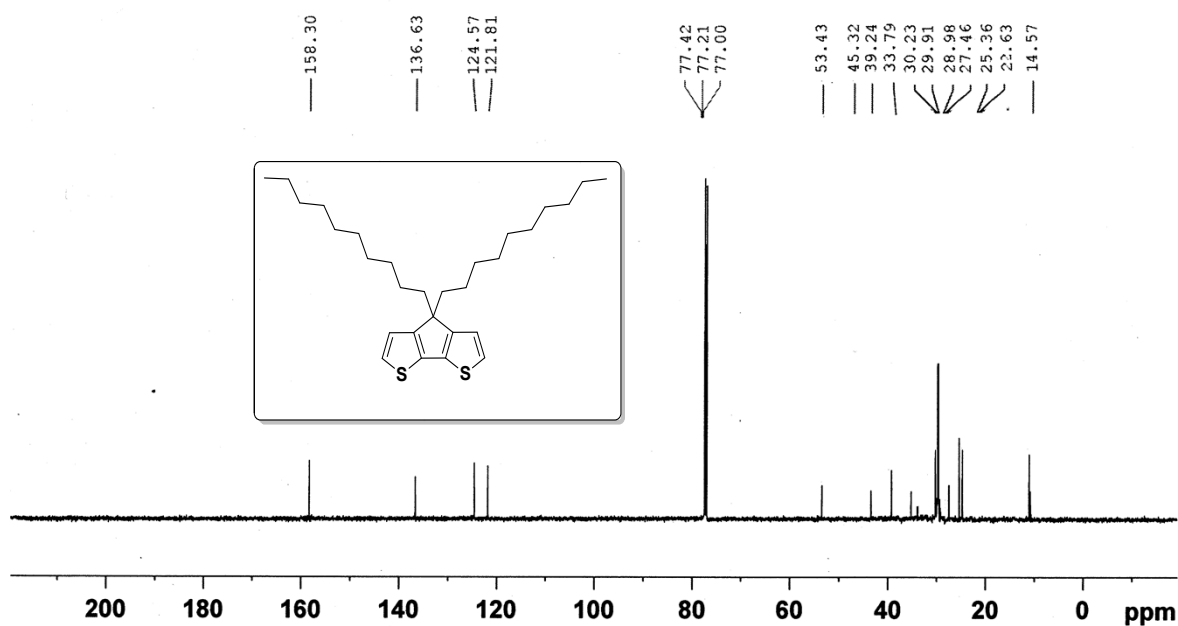

**Figure S8:**  $^{13}\text{C}$  NMR spectrum of 4,4'-Bisdecyl-4*H*-cyclopenta[2,1-*b*:3,4-*b'*]dithiophene (entry 1c).

|               |                 |             |    |                 |              |                        |                        |
|---------------|-----------------|-------------|----|-----------------|--------------|------------------------|------------------------|
| Sample Name   | TBR-CPDT-C10A   | Position    | -1 | Instrument Name | Instrument 1 | User Name              |                        |
| Inj Vol       | -10             | InjPosition |    | SampleType      | Sample       | IRM Calibration Status | Success                |
| Data Filename | TBR-CPDT-C10A.d | ACQ Method  |    | Comment         |              | Acquired Time          | 11/14/2013 11:30:27 AM |

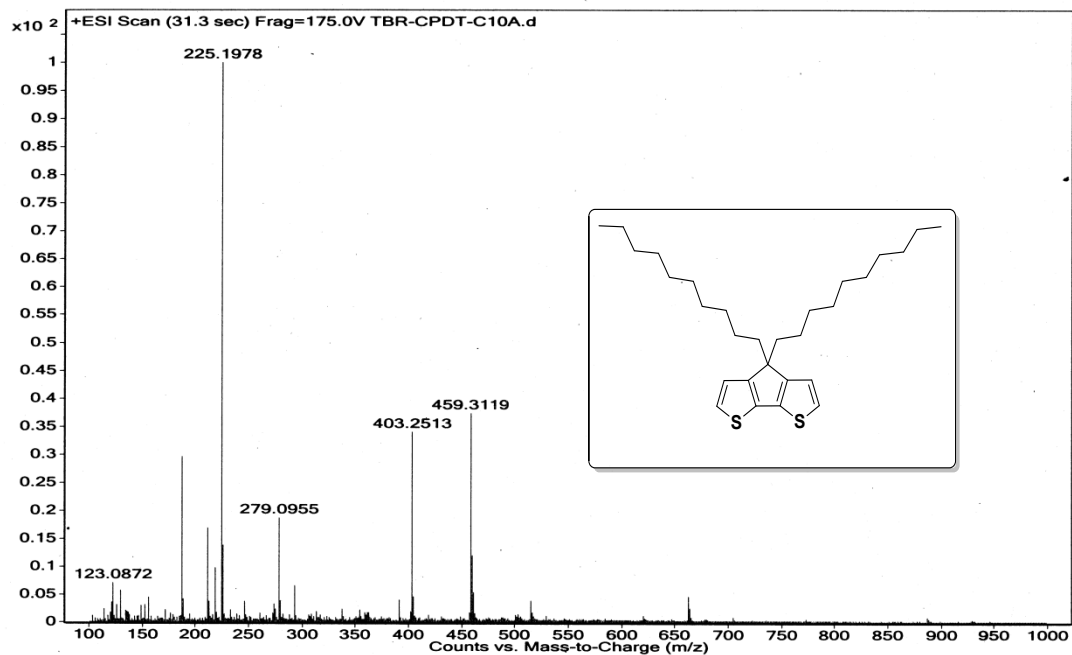

**Figure S9:** ESI-MS spectrum of 4,4'-Bisdecyl-4H-cyclopenta[2,1-b:3,4-b']dithiophene (entry 1c).

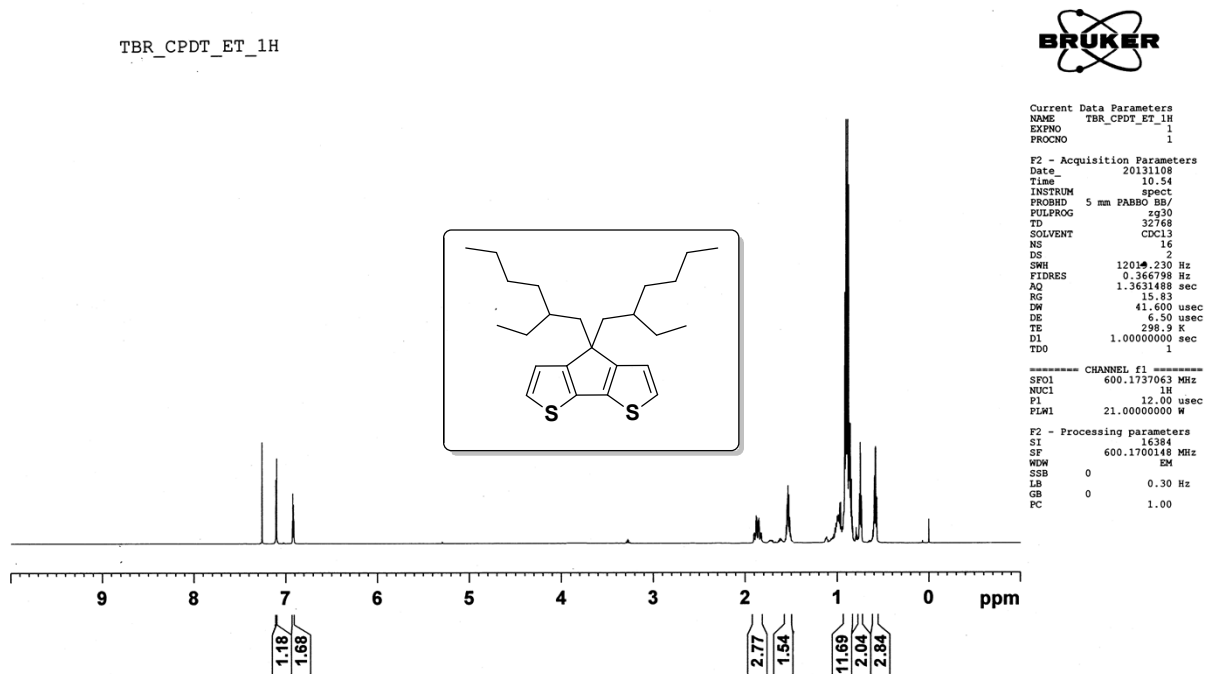

**Figure S10:** <sup>1</sup>H-NMR spectrum of 4,4'-Bis(2-ethylhexyl)-4H-cyclopenta[2,1-b:3,4-b']dithiophene (entry 1d).

TBR\_CPD\_T ET\_13C

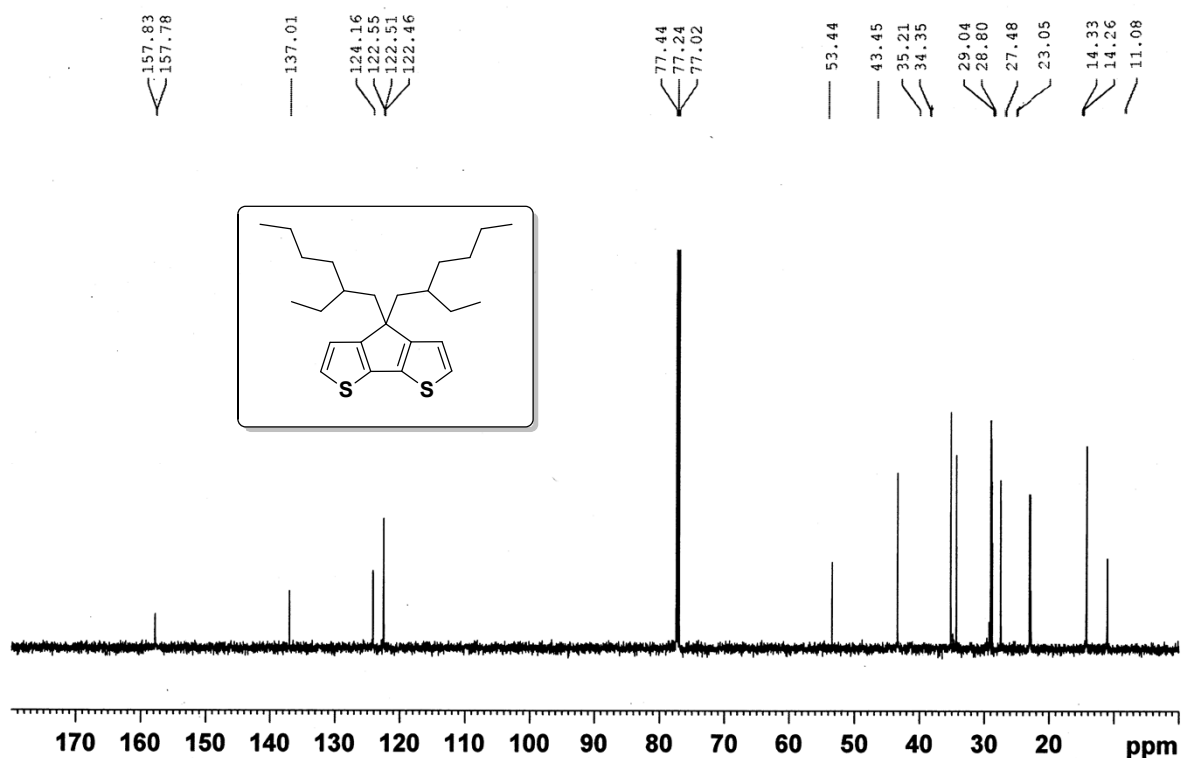

**Figure S11:**  $^{13}\text{C}$  NMR spectrum of 4,4'-Bis(2-ethylhexyl)-4*H*-cyclopenta[2,1-*b*:3,4-*b'*]dithiophene (entry 1d).

| Sample Name   | TBR-CPDT-ETA   | Position    | -1 | Instrument Name | Instrument 1 | User Name              |                        |
|---------------|----------------|-------------|----|-----------------|--------------|------------------------|------------------------|
| Inj Vol       | -10            | InjPosition |    | SampleType      | Sample       | IRM Calibration Status | Success                |
| Data Filename | TBR-CPDT-ETA.d | ACQ Method  |    | Comment         |              | Acquired Time          | 11/14/2013 11:37:28 AM |

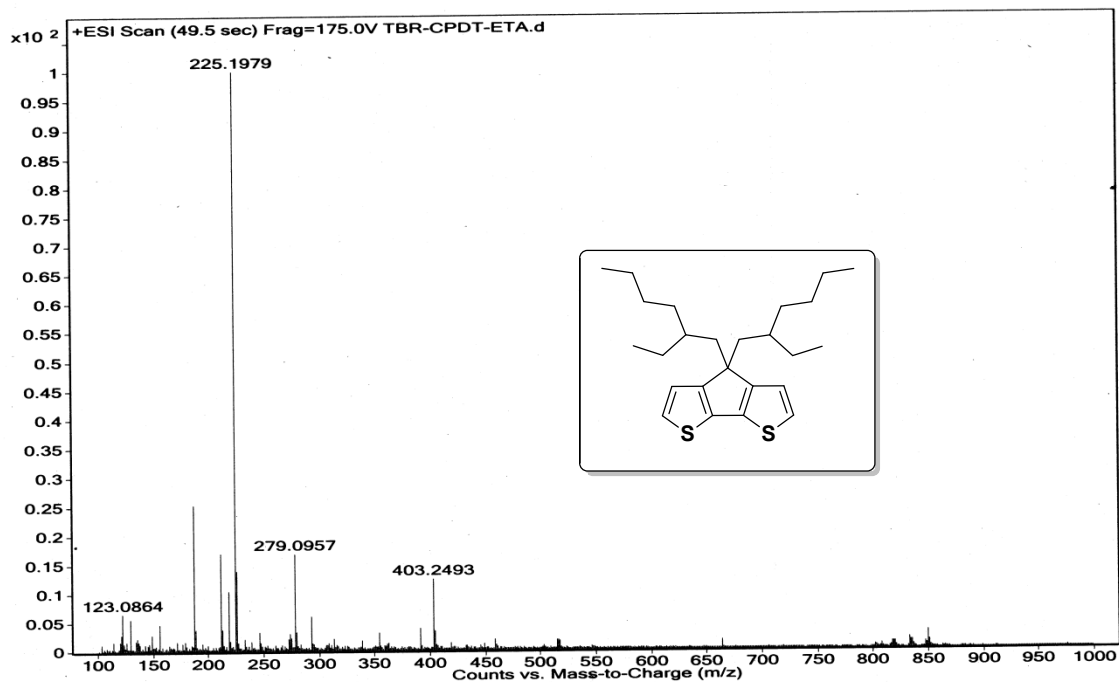

**Figure S12:** ESI-MS spectrum of 4,4'-Bis(2-ethylhexyl)-4*H*-cyclopenta[2,1-*b*:3,4-*b'*]dithiophene (entry 1d).

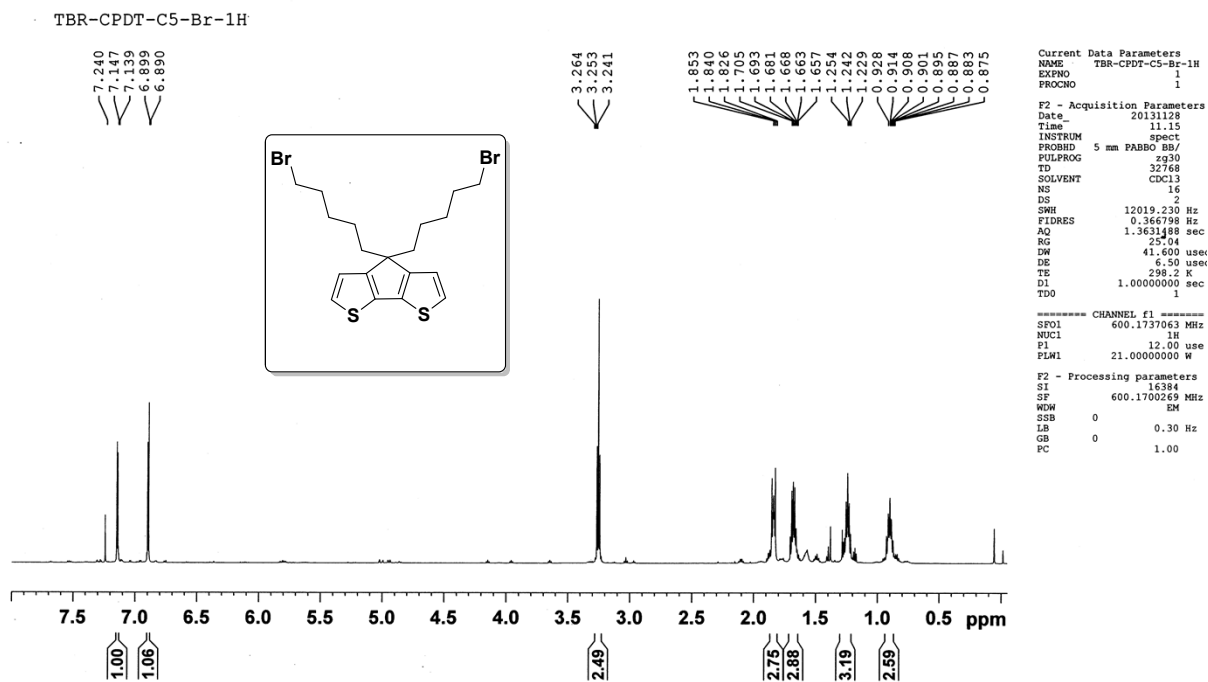

**Figure S13:**  $^1\text{H}$ -NMR spectrum of 4,4'-Bis-(5-bromopentyl)-4*H*-cyclopenta[2,1-b:3,4-b']dithiophene (entry 1e).

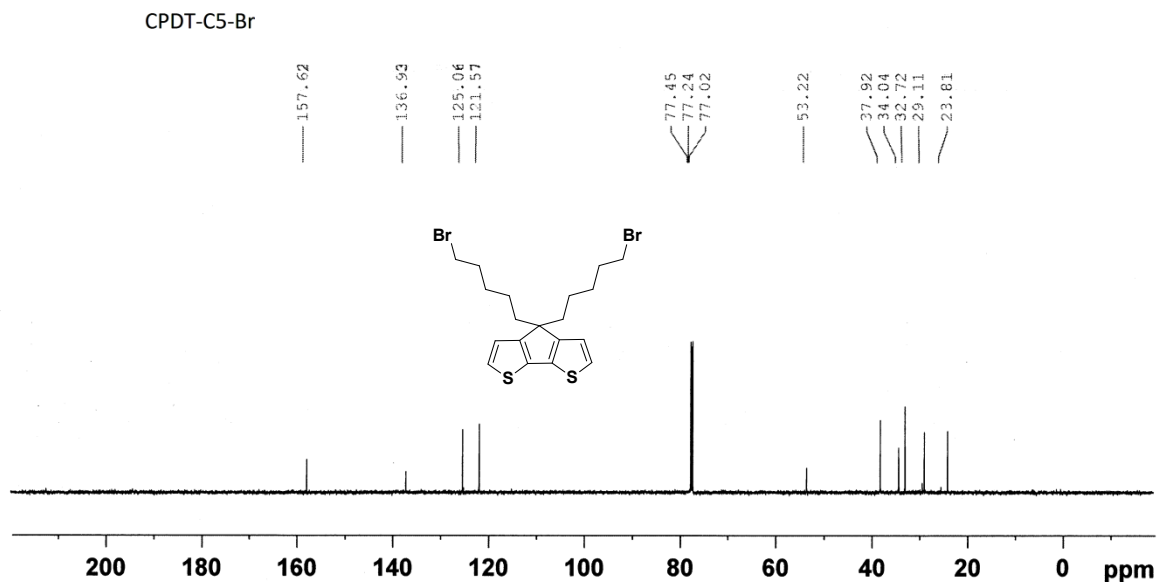

**Figure S14:**  $^{13}\text{C}$  NMR spectrum of 4,4'-Bis-(5-bromopentyl)-4*H*-cyclopenta[2,1-b:3,4-b']dithiophene (entry 1e).



|               |                    |             |    |                 |              |                        |                       |
|---------------|--------------------|-------------|----|-----------------|--------------|------------------------|-----------------------|
| Sample Name   | TBR-11-CPDT-C5-BR  | Position    | -1 | Instrument Name | Instrument 1 | User Name              |                       |
| Inj Vol       | -10                | InjPosition |    | SampleType      | Sample       | IRM Calibration Status | Success               |
| Data Filename | TBR-11-CPDT-C5BR.d | ACQ Method  |    | Comment         |              | Acquired Time          | 2/14/2014 11:39:37 AM |

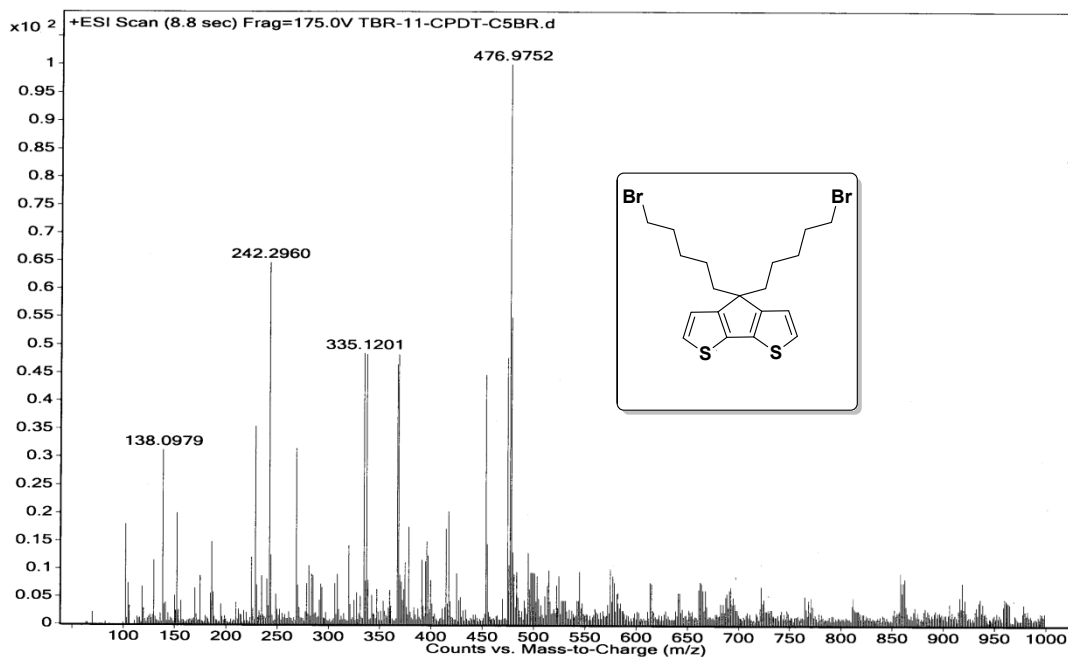

**Figure S15:** ESI-MS spectrum of 4,4'-Bis-(5-bromopentyl)-4H-cyclopenta[2,1-b:3,4-b']dithiophene (entry 1e).

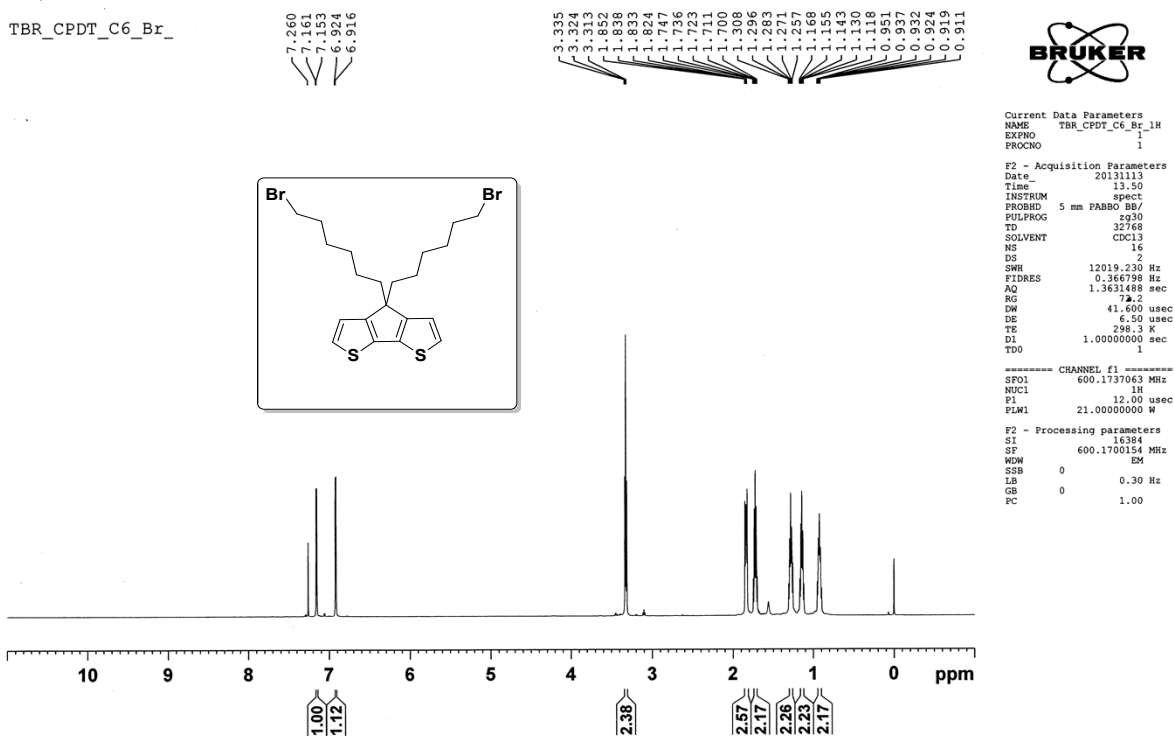

**Figure S16:** <sup>1</sup>H NMR spectrum of 4,4'-Bis-(6-bromohexyl)-4H-cyclopenta[2,1-b:3,4-b']dithiophene (entry 1f).

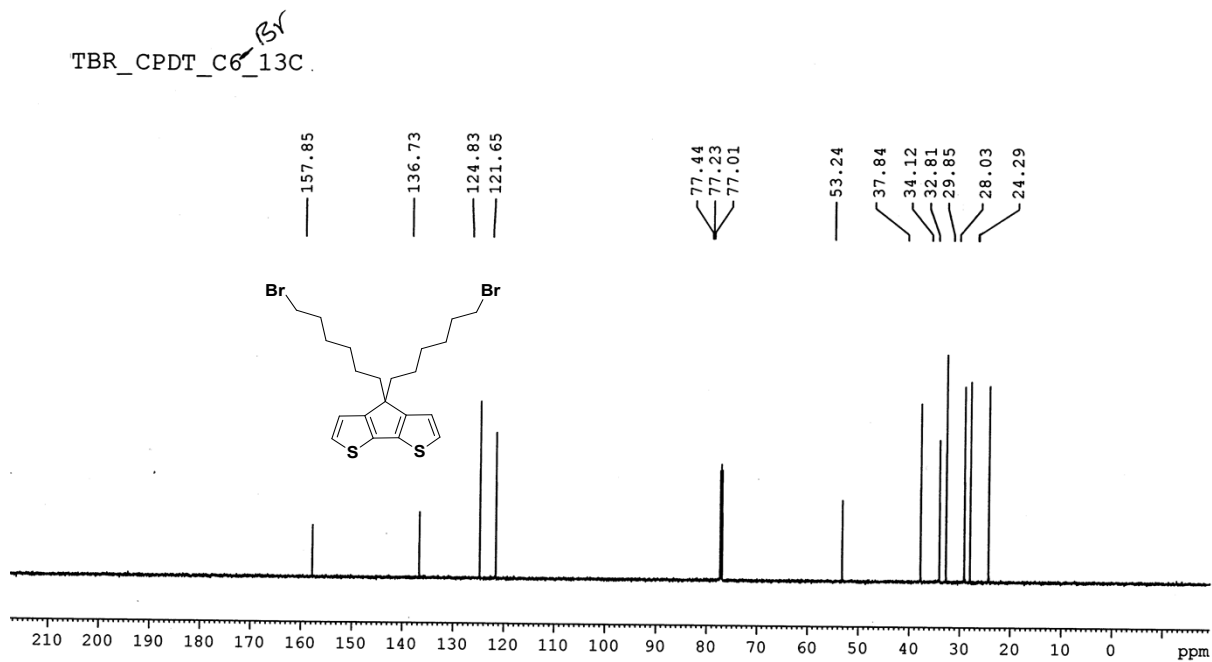

**Figure S17:**  $^{13}\text{C}$  NMR spectrum of 4,4'-Bis-(6-bromohexyl)-4*H*-cyclopenta[2,1-b:3,4-b']dithiophene (entry 1f).

| Sample Name   | TBR-CPDT-C6BRA   | Position    | -1 | Instrument Name | Instrument 1 | User Name              |                        |
|---------------|------------------|-------------|----|-----------------|--------------|------------------------|------------------------|
| Inj Vol       | -10              | InjPosition |    | SampleType      | Sample       | IRM Calibration Status | Success                |
| Data Filename | TBR-CPDT-C6BRA.d | ACQ Method  |    | Comment         |              | Acquired Time          | 11/14/2013 11:33:57 AM |

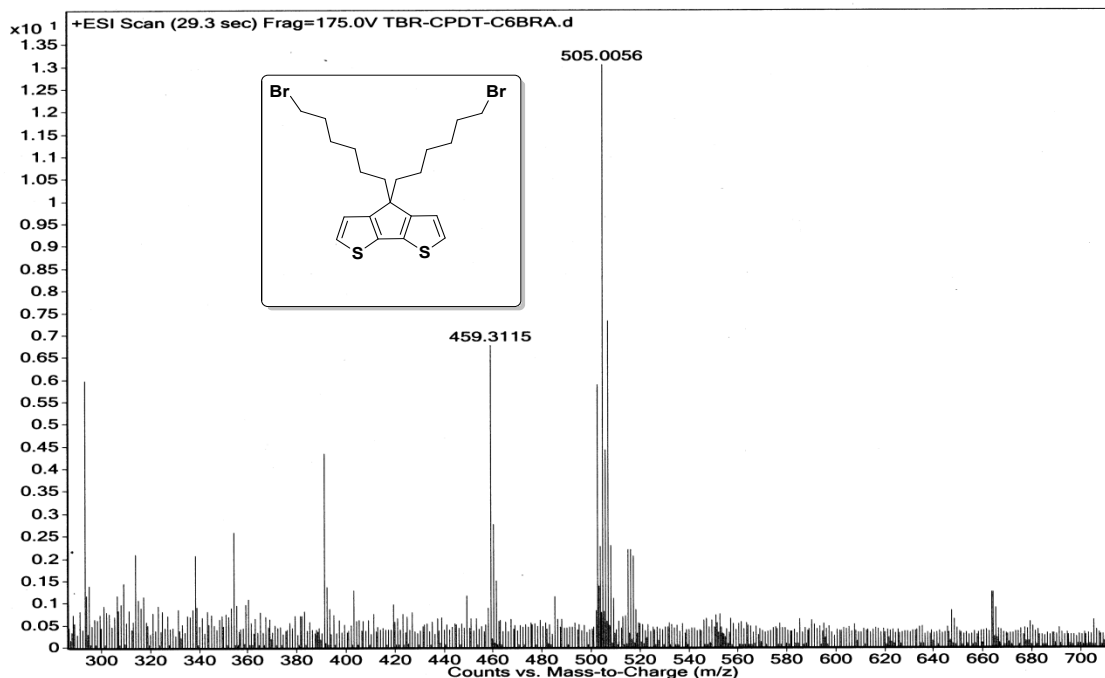

**Figure S18:** ESI-MS spectrum of 4,4'-Bis-(6-bromohexyl)-4*H*-cyclopenta[2,1-b:3,4-b']dithiophene (entry 1f).

TBR-CPDT-C8-Br-1H

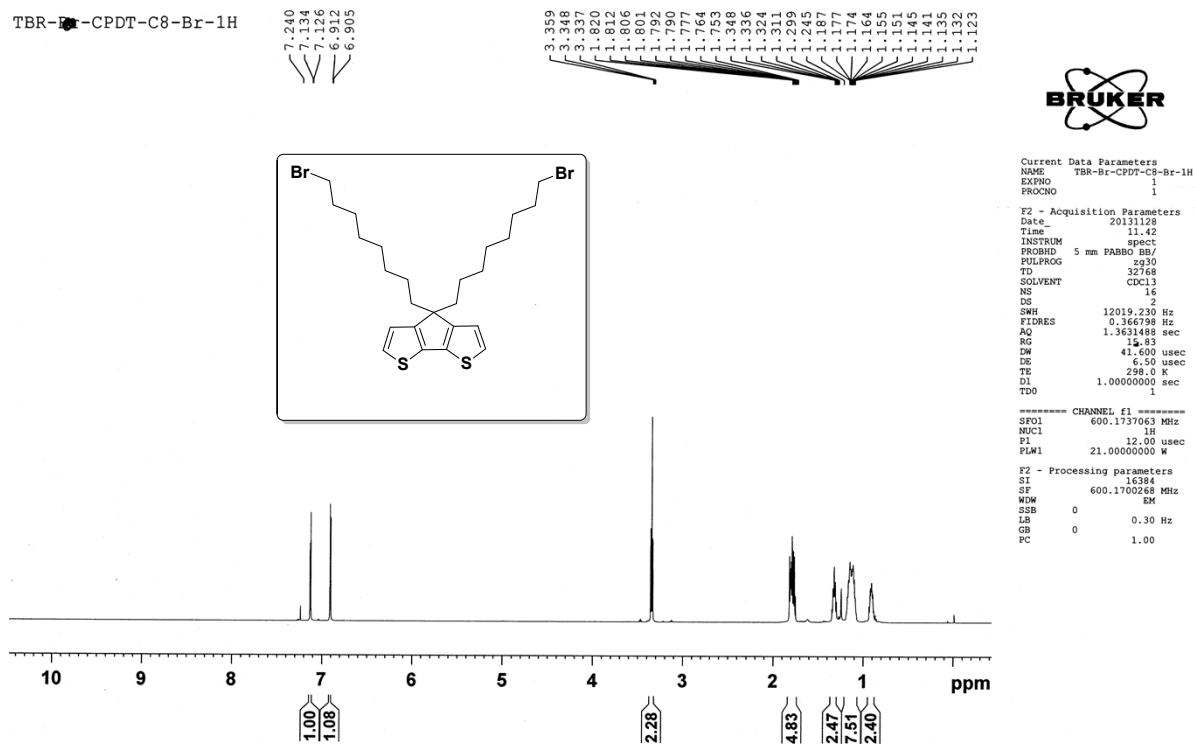

**Figure S19:**  $^1\text{H}$  NMR spectrum of 4,4'-Bis-(8-bromooctyl)-4*H*-cyclopenta[2,1-b:3,4-b']dithiophene (entry 1g).

CPDT\_C8\_Br\_13C

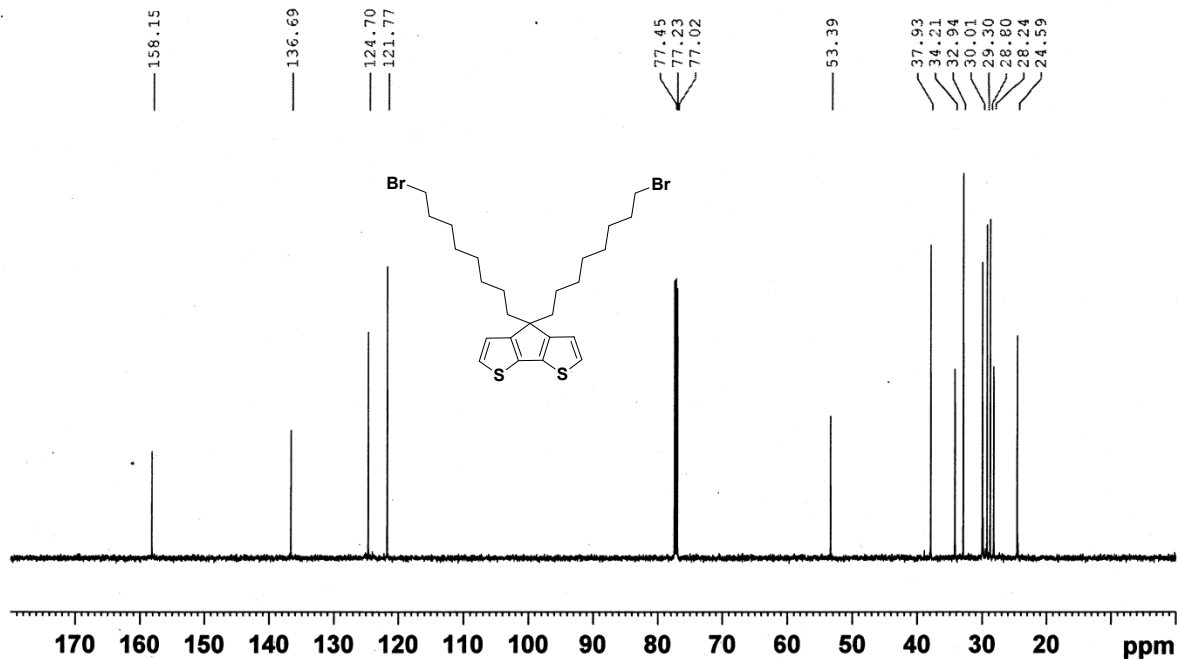

**Figure S20:**  $^{13}\text{C}$  NMR spectrum of 4,4'-Bis-(8-bromooctyl)-4*H*-cyclopenta[2,1-b:3,4-b']dithiophene (entry 1g).

| Sample Name   | TBR-CPDT-C8-BR2A   | Position    | -1 | Instrument Name | Instrument 1 | User Name              |                        |
|---------------|--------------------|-------------|----|-----------------|--------------|------------------------|------------------------|
| Inj Vol       | -10                | InjPosition |    | SampleType      | Sample       | IRM Calibration Status | Success                |
| Data Filename | TBR-CPDT-C8-BR2A.d | ACQ Method  |    | Comment         |              | Acquired Time          | 11/14/2013 11:39:24 AM |

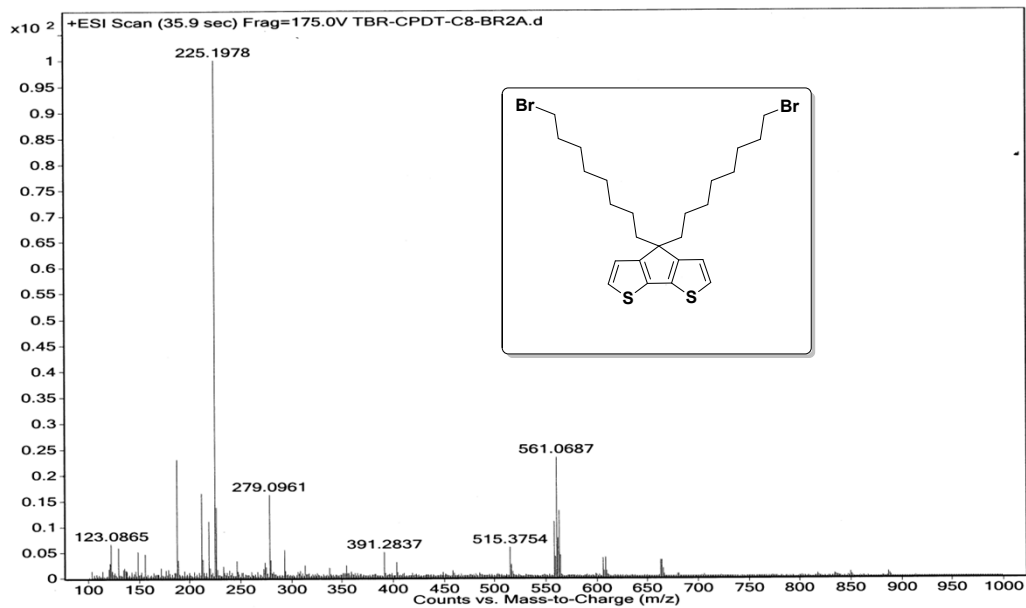

**Figure S21:** ESI-MS Spectrum of 4,4'-Bis-(8-bromooctyl)-4H-cyclopenta[2,1-b:3,4-b']dithiophene (entry 1g).

TBR-CPDT-C6-I-2-1H

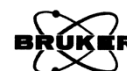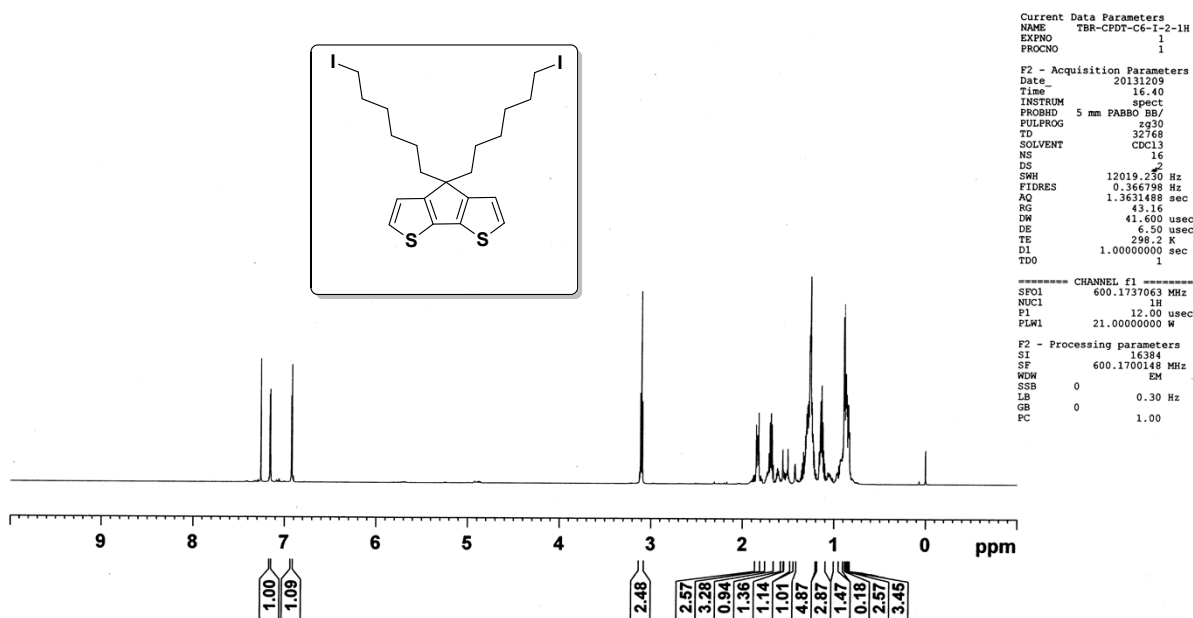

```

Current Data Parameters
NAME      TBR-CPDT-C6-I-2-1H
EXPNO    1
PROCNO   1

F2 - Acquisition Parameters
Date_    20131209
Time     16.40
INSTRUM  spect
PROBHD   5 mm PABBO BB/
PULPROG  zg30
TD       32768
SOLVENT  CDCl3
NS       16
DS       2
SWH      12019.230 Hz
FIDRES   0.366798 Hz
AQ       1.3631488 sec
RG       43.16
DW       41.600 usec
DE       6.50 usec
TE       298.2 K
D1       1.00000000 sec
TDO      1

===== CHANNEL f1 =====
SFO1     600.137063 MHz
NUC1     1H
F1       12.00 usec
PLW1     21.00000000 W

F2 - Processing parameters
SI       16384
SF       600.1700148 MHz
WDW      EM
SSB      0
LB       0.30 Hz
GB       0
PC       1.00

```

**Figure S22:** <sup>1</sup>H NMR spectrum of 4,4'-Bis-(6-iodohexyl)-4H-cyclopenta[2,1-b:3,4-b']dithiophene (entry 1h).

TBR-CPDT-C6-I-2\_13C

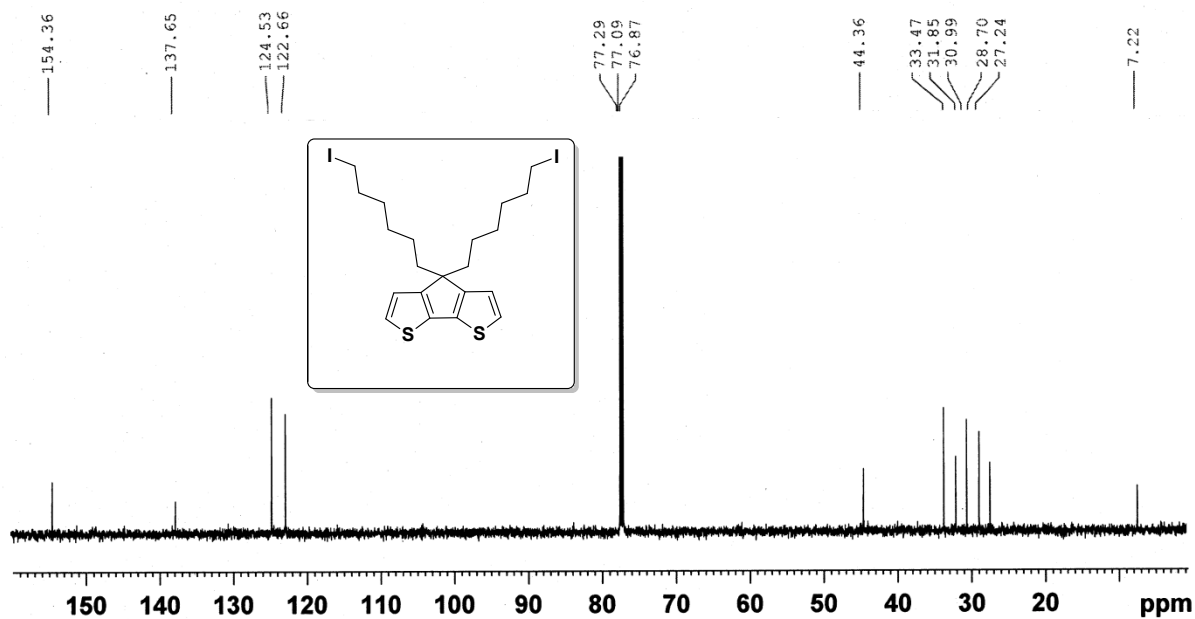

**Figure S23:**  $^{13}\text{C}$  NMR spectrum of 4,4'-Bis-(6-iodohexyl)-4*H*-cyclopenta[2,1-*b*:3,4-*b'*]dithiophene (entry 1h).

| Sample Name   | TBR-11-CPDT-C6-I-2   | Position    | -1 | Instrument Name | Instrument 1 | User Name              |                       |
|---------------|----------------------|-------------|----|-----------------|--------------|------------------------|-----------------------|
| Inj Vol       | -10                  | InjPosition |    | SampleType      | Sample       | IRM Calibration Status | Success               |
| Data Filename | TBR-11-CPDT-C6-I-2.d | ACQ Method  |    | Comment         |              | Acquired Time          | 2/14/2014 11:46:19 AM |

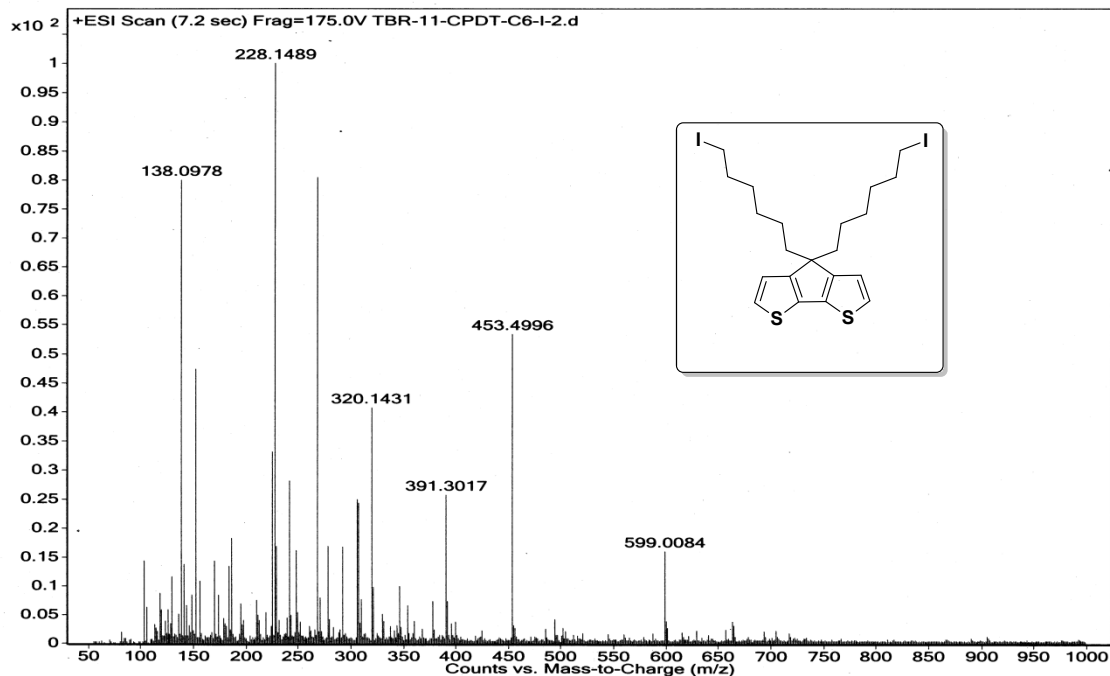

**Figure S24:** ESI-MS spectrum of spectrum of 4,4'-Bis-(6-iodohexyl)-4*H*-cyclopenta[2,1-*b*:3,4-*b'*]dithiophene (entry 1h).

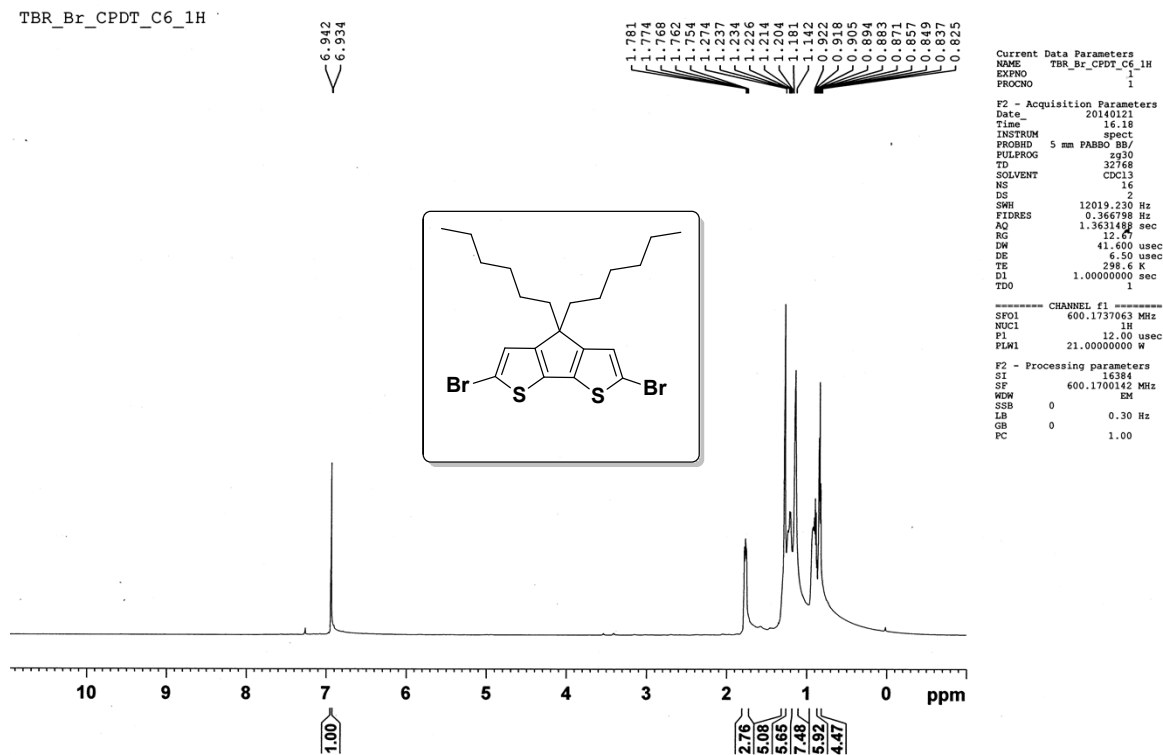

**Figure S25:**  $^1\text{H}$  NMR spectrum of 2,6-Dibromo-4,4'-dihexyl-4*H*-cyclopenta[2,1-*b*:3,4-*b'*]dithiophene (entry 1k).

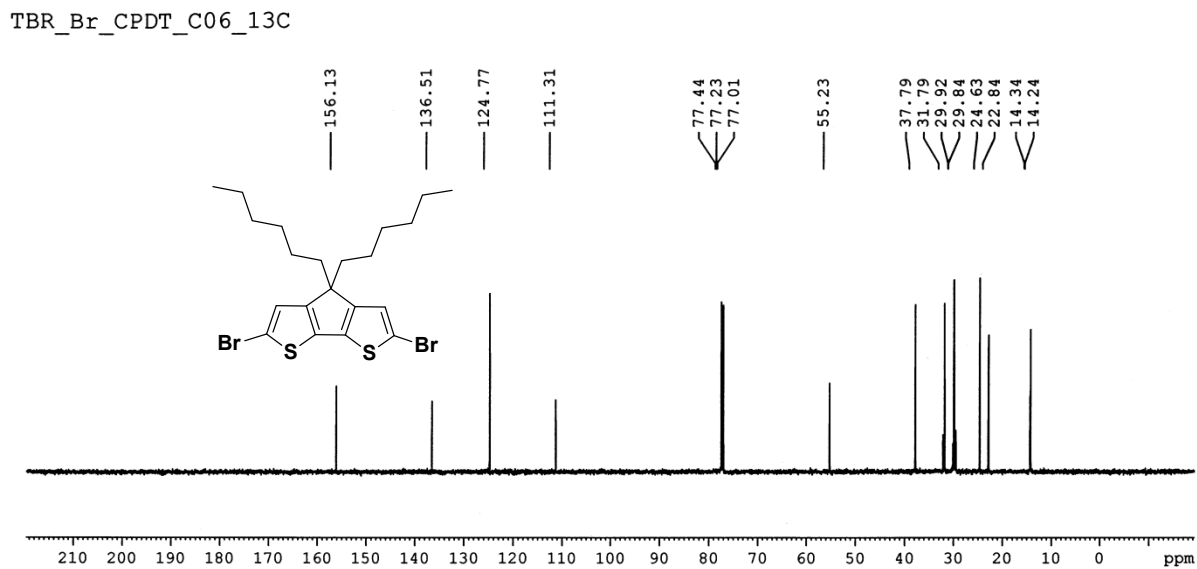

**Figure S26:**  $^{13}\text{C}$  NMR spectrum of 2,6-Dibromo-4,4'-dihexyl-4*H*-cyclopenta[2,1-*b*:3,4-*b'*]dithiophene (entry 1k).

|               |             |             |    |                 |              |                        |                       |
|---------------|-------------|-------------|----|-----------------|--------------|------------------------|-----------------------|
| Sample Name   | CPDT-C6-1   | Position    | -1 | Instrument Name | Instrument 1 | User Name              |                       |
| Inj Vol       | -10         | InjPosition |    | SampleType      | Sample       | IRM Calibration Status | Success               |
| Data Filename | CPDT-C6-1.d | ACQ Method  |    | Comment         |              | Acquired Time          | 8/13/2013 11:15:10 AM |

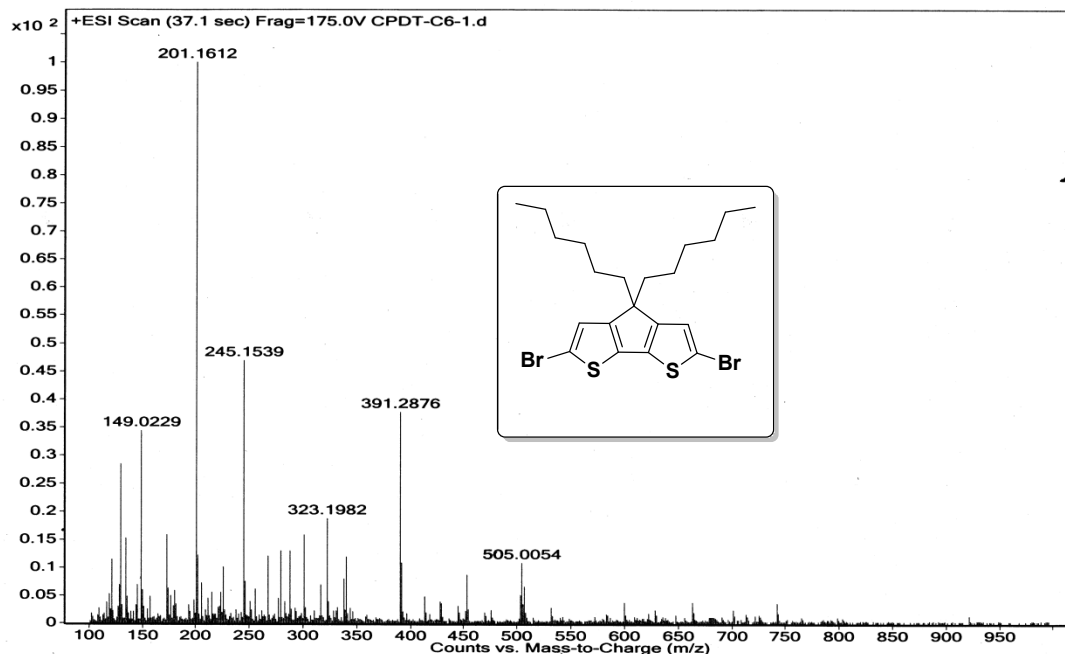

**Figure S27:** ESI-MS spectrum of 2,6-Dibromo-4,4'-diethyl-4H-cyclopenta[2,1-b:3,4-b']dithiophene (entry 1k).

TBR- Br-CPDT-C8-1H

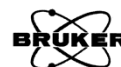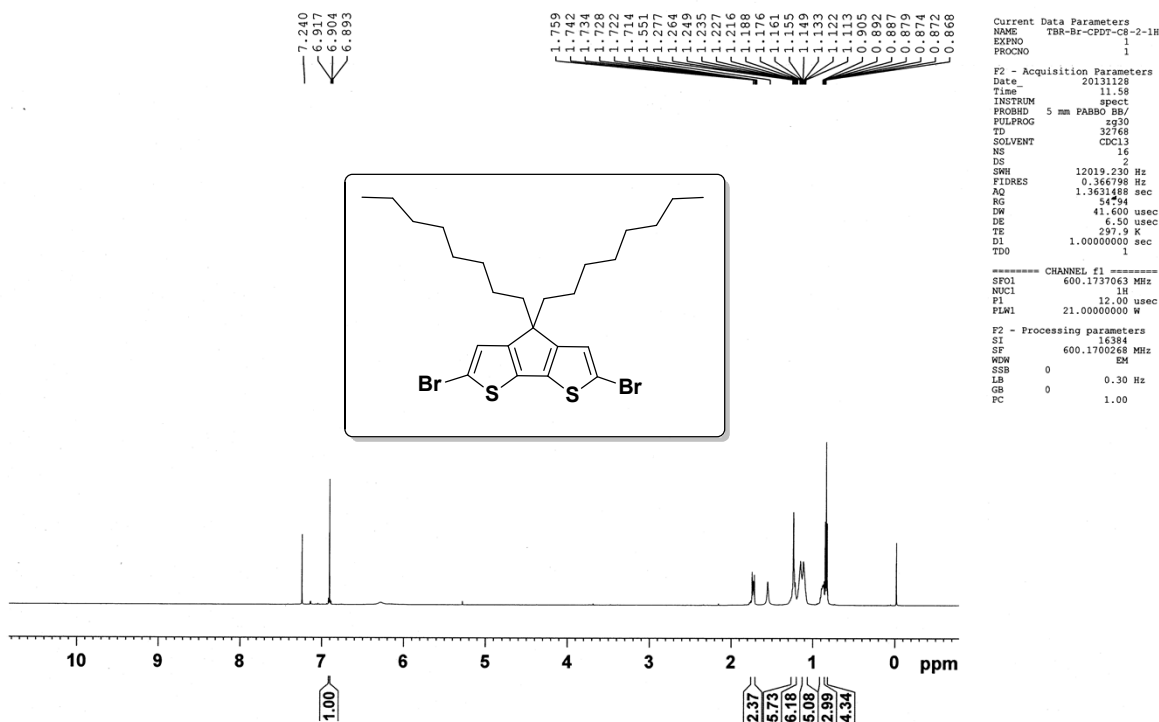

**Figure S28:** <sup>1</sup>H NMR spectrum of 2,6-Dibromo-4,4'-dioctyl-4H-cyclopenta[2,1-b:3,4-b']dithiophene (entry 1l).

TBR/CPDT\_OCTYL\_13C

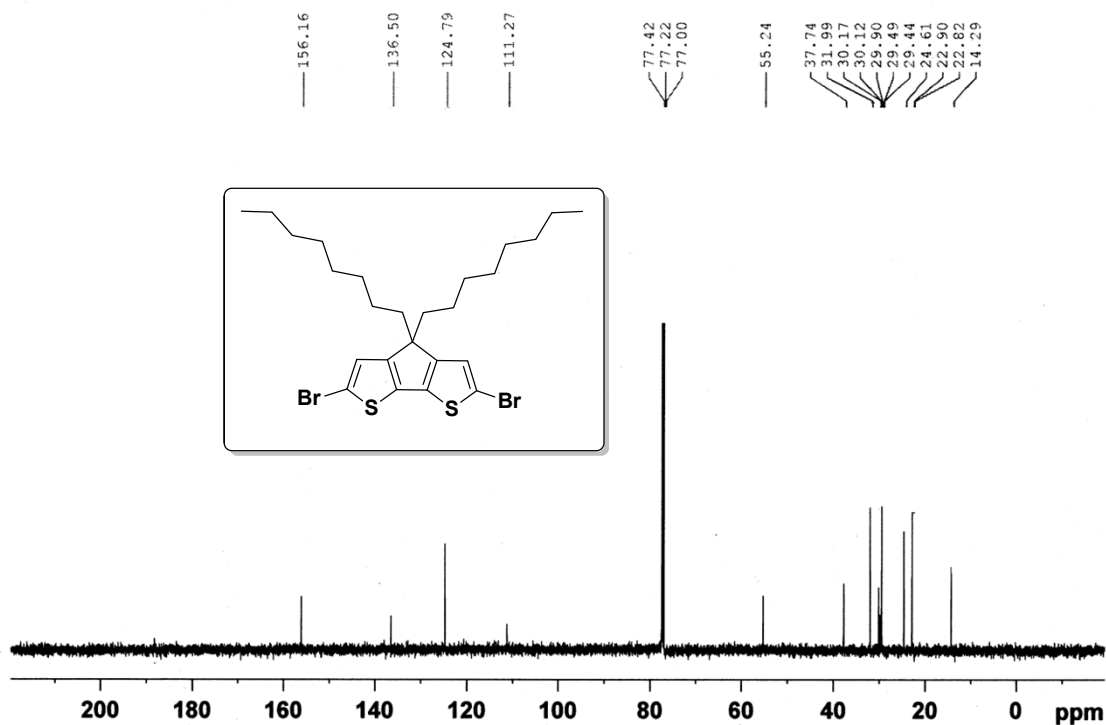

**Figure S29:**  $^{13}\text{C}$  NMR spectrum of 2,6-Dibromo-4,4'-dioctyl-4*H*-cyclopenta[2,1-b:3,4-b']dithiophene (entry 11).

| Sample Name   | Br-CPDT | Position    | -1 | Instrument Name | Instrument 1 | User Name              |                       |
|---------------|---------|-------------|----|-----------------|--------------|------------------------|-----------------------|
| Inj Vol       | -10     | InjPosition |    | SampleType      | Sample       | IRM Calibration Status | Success               |
| Data Filename | Br-CPDT | ACQ Method  |    | Comment         |              | Acquired Time          | 7/11/2013 12:23:23 PM |

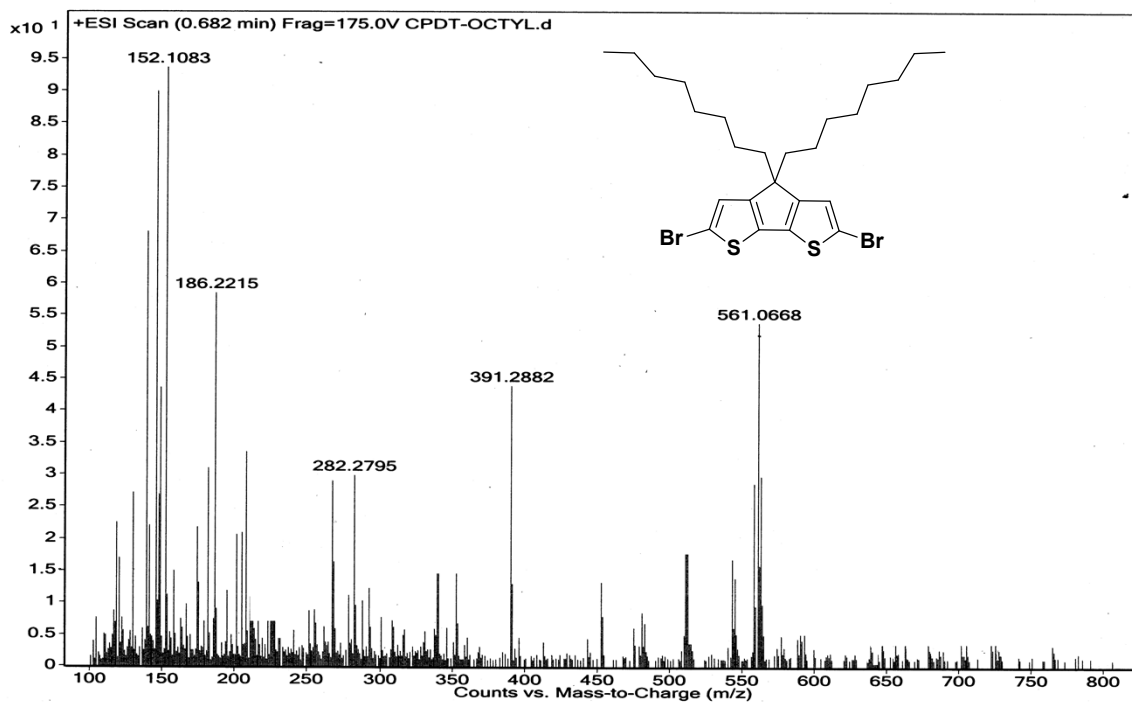

**Figure S30:** ESI-MS spectrum of 2,6-Dibromo-4,4'-dioctyl-4*H*-cyclopenta[2,1-b:3,4-b']dithiophene (entry 11).



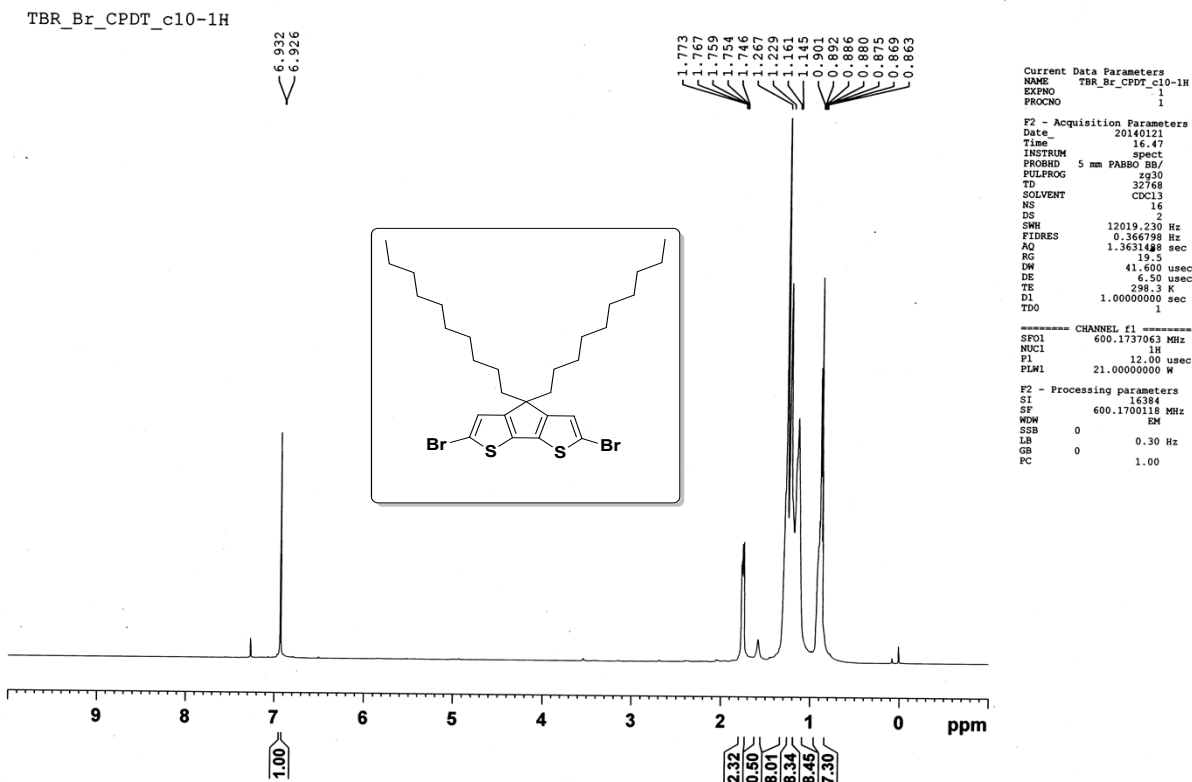

**Figure S31:**  $^1\text{H}$  NMR spectrum of 2,6-Dibromo-4,4'-didecyl-4H-cyclopenta[2,1-b:3,4-b']dithiophene (entry 1m).

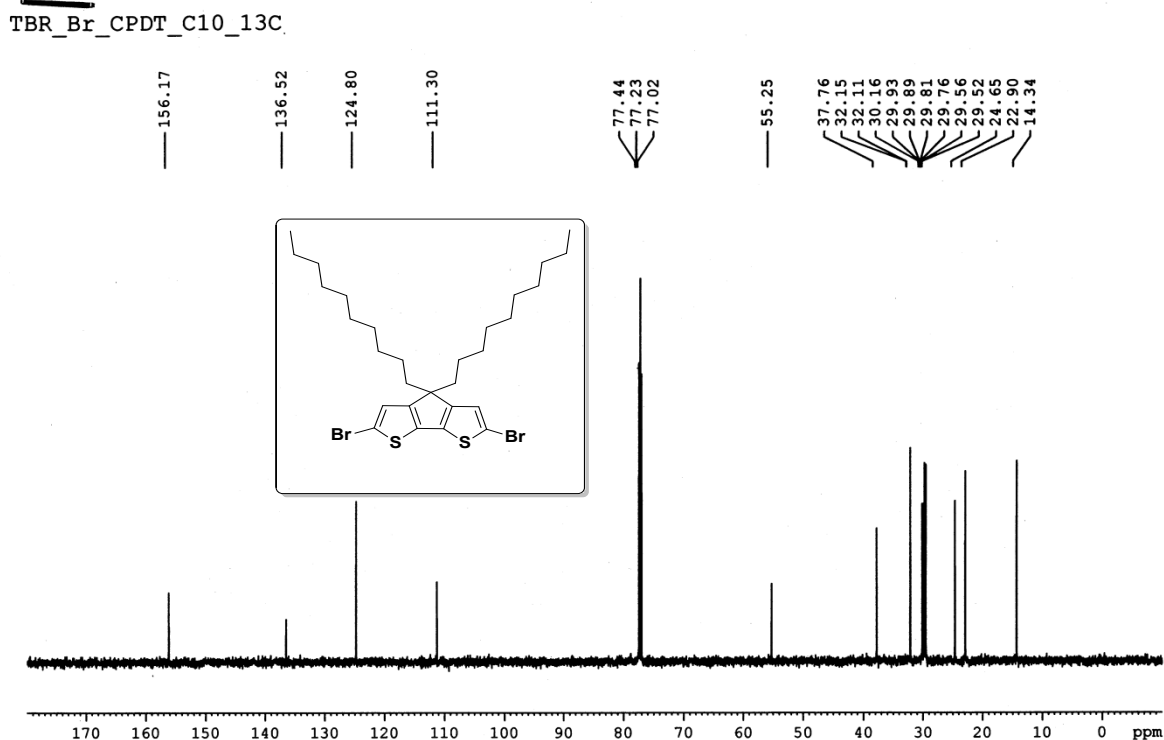

**Figure S32:**  $^{13}\text{C}$  NMR 2,6-Dibromo-4,4'-bisdecyl-4H-cyclopenta[2,1-b:3,4-b']dithiophene (entry 1m).

|               |               |             |    |                 |              |                        |                       |
|---------------|---------------|-------------|----|-----------------|--------------|------------------------|-----------------------|
| Sample Name   | Br-CPDT-C10   | Position    | -1 | Instrument Name | Instrument 1 | User Name              |                       |
| Inj Vol       | -10           | InjPosition |    | SampleType      | Sample       | IRM Calibration Status | Success               |
| Data Filename | Br-CPDT-C10.d | ACQ Method  |    | Comment         |              | Acquired Time          | 8/19/2013 10:59:56 AM |

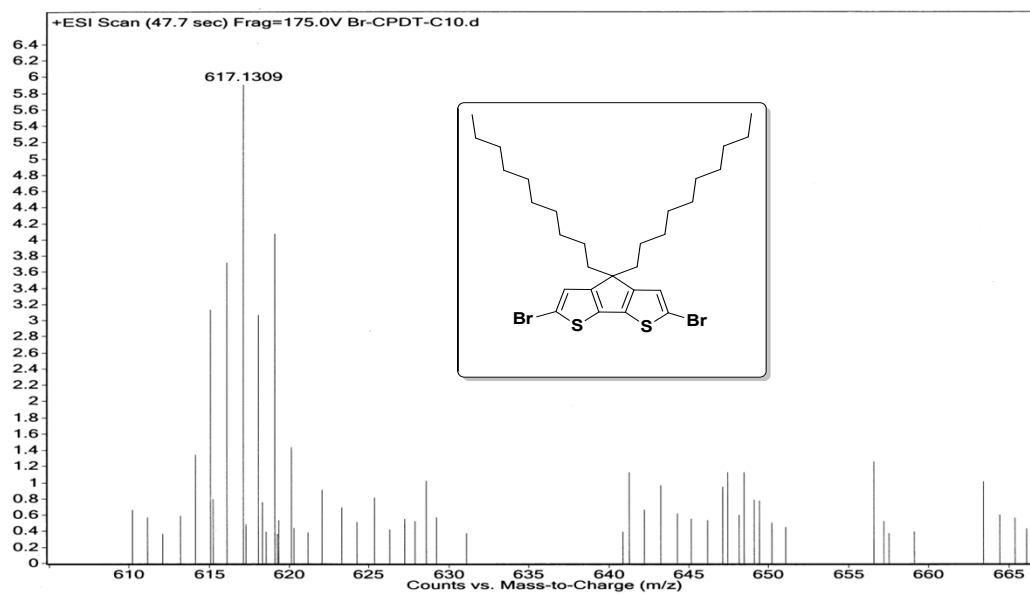

**Figure S33:** ESI-MS spectrum of 2,6-Dibromo-4,4'-bisdecyl-4*H*-cyclopenta[2,1-b:3,4-b']dithiophene (entry 1m).

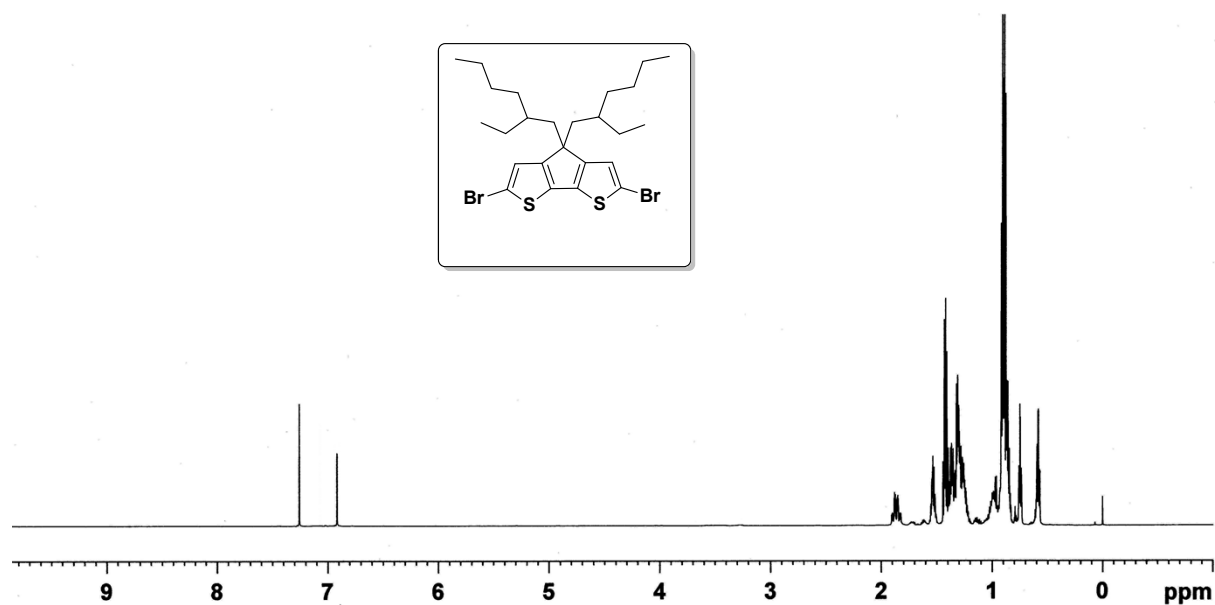

**Figure S34:** <sup>1</sup>H NMR spectrum of 2,6-Dibromo-4,4'-bis(2-ethylhexyl)-4*H*-cyclopenta[2,1-b:3,4-b']dithiophene (entry 1n).

TBR\_Br-CPDT-ET-19-13C

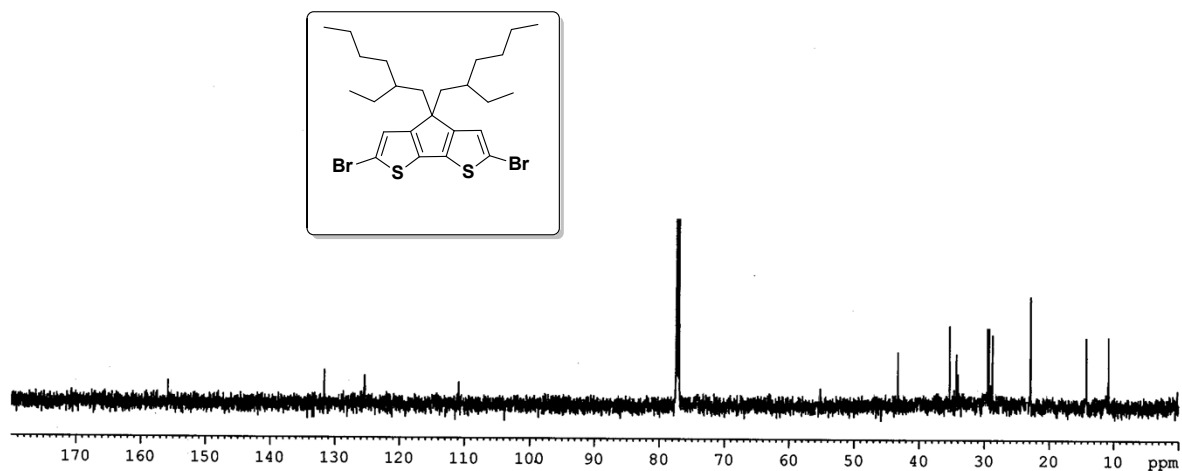

**Figure S35:**  $^{13}\text{C}$  NMR spectrum of 2,6-Dibromo-4,4'-bis(2-ethylhexyl)-4*H*-cyclopenta[2,1-b:3,4-b']dithiophene (entry 1n).

|               |            |             |    |                 |              |                        |                       |
|---------------|------------|-------------|----|-----------------|--------------|------------------------|-----------------------|
| Sample Name   | Br-CPDT-ET | Position    | -1 | Instrument Name | Instrument 1 | User Name              |                       |
| Inj Vol       | -10        | InjPosition |    | SampleType      | Sample       | IRM Calibration Status | Success               |
| Data Filename | Br-CPDT-ET | ACQ Method  |    | Comment         |              | Acquired Time          | 7/11/2013 12:47:23 PM |

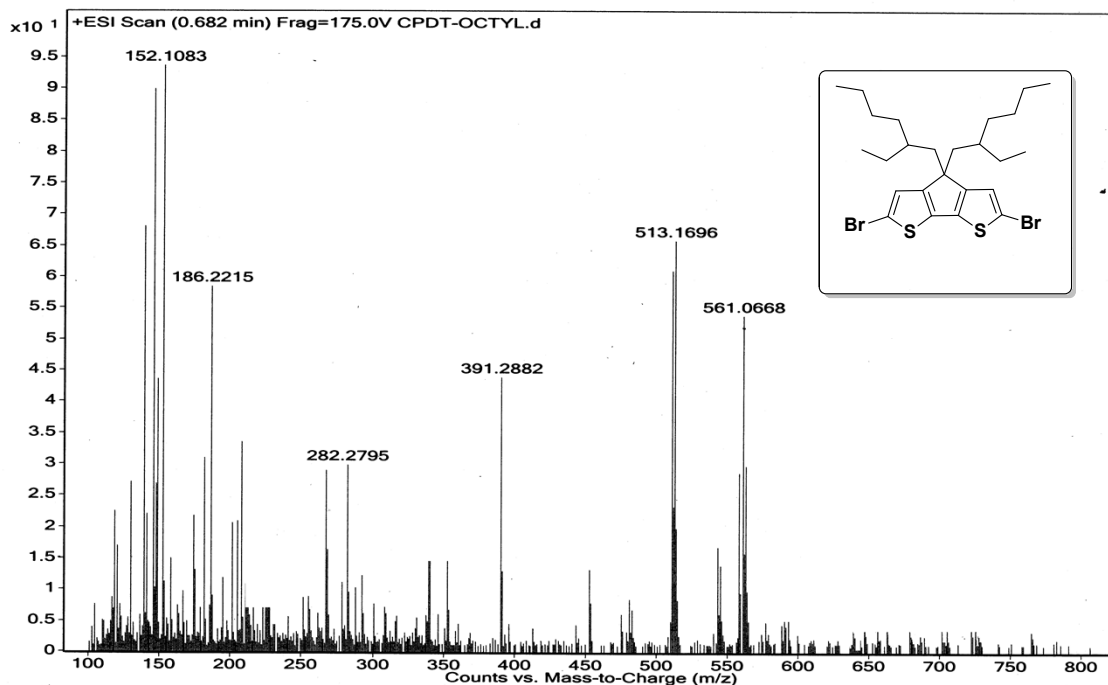

**Figure S36:** ESI-MS spectrum of 2,6-Dibromo-4,4'-bis(2-ethylhexyl)-4*H*-cyclopenta[2,1-b:3,4-b']dithiophene (entry 1n).

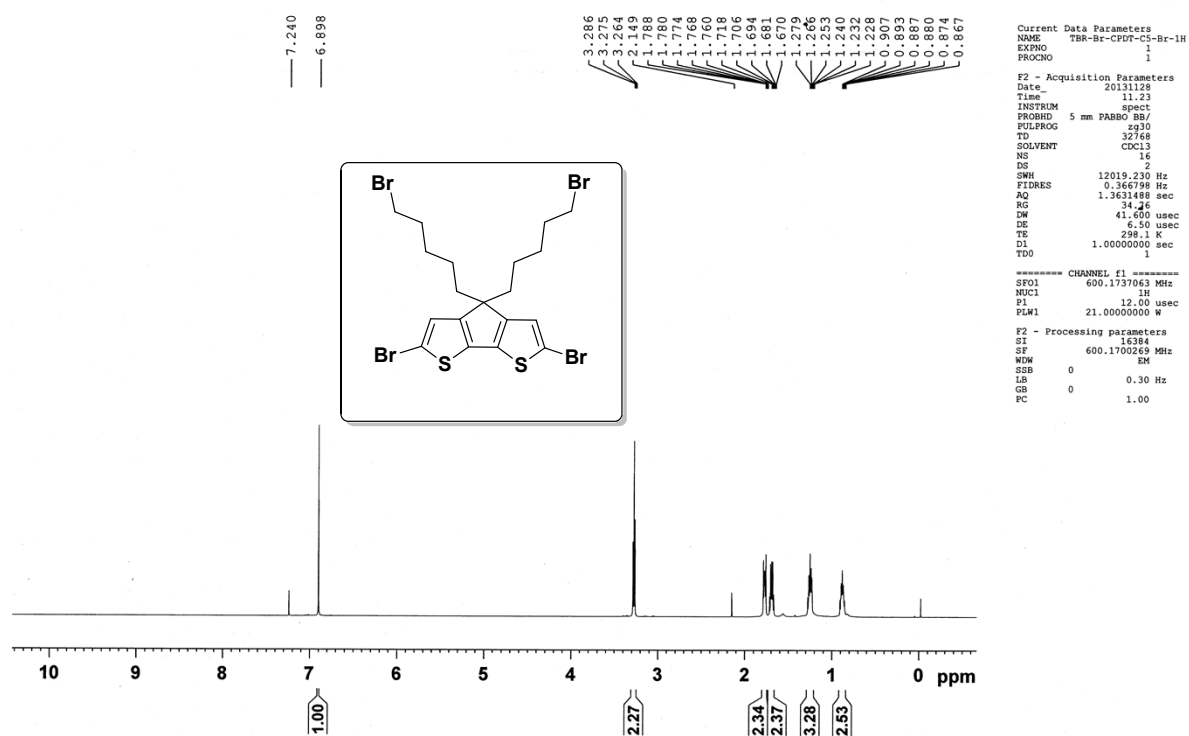

**Figure S37:**  $^1\text{H}$  NMR spectrum of 2,6-Dibromo-4,4'-bis(5-bromopentyl)-4*H*-cyclopenta[2,1-b:3,4-b']dithiophene (entry 1o).

Br\_CPDT\_C5\_Br\_13C

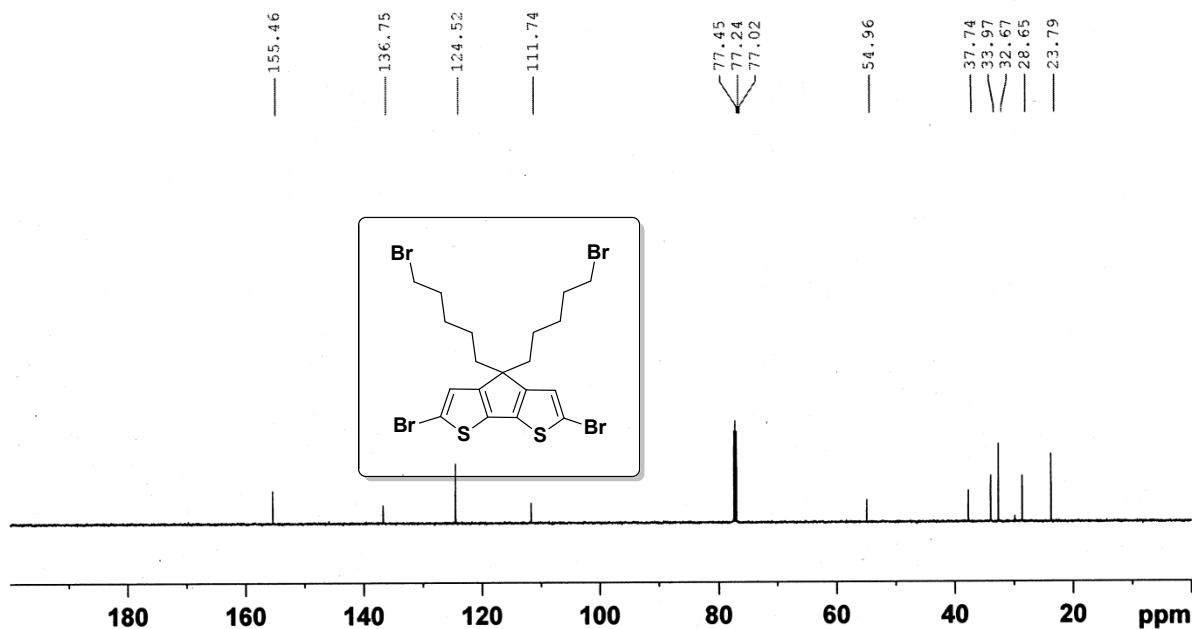

**Figure S38:**  $^{13}\text{C}$  NMR spectrum of 2,6-Dibromo-4,4'-bis(5-bromopentyl)-4*H*-cyclopenta[2,1-b:3,4-b']dithiophene (entry 1o).

|               |                |             |    |                 |              |                        |                      |
|---------------|----------------|-------------|----|-----------------|--------------|------------------------|----------------------|
| Sample Name   | Br-cpdt-c5bR   | Position    | -1 | Instrument Name | Instrument 1 | User Name              |                      |
| Inj Vol       | -10            | InjPosition |    | SampleType      | Sample       | IRM Calibration Status | Success              |
| Data Filename | Br-cpdt-c5bR.d | ACQ Method  |    | Comment         |              | Acquired Time          | 9/5/2013 10:59:38 AM |

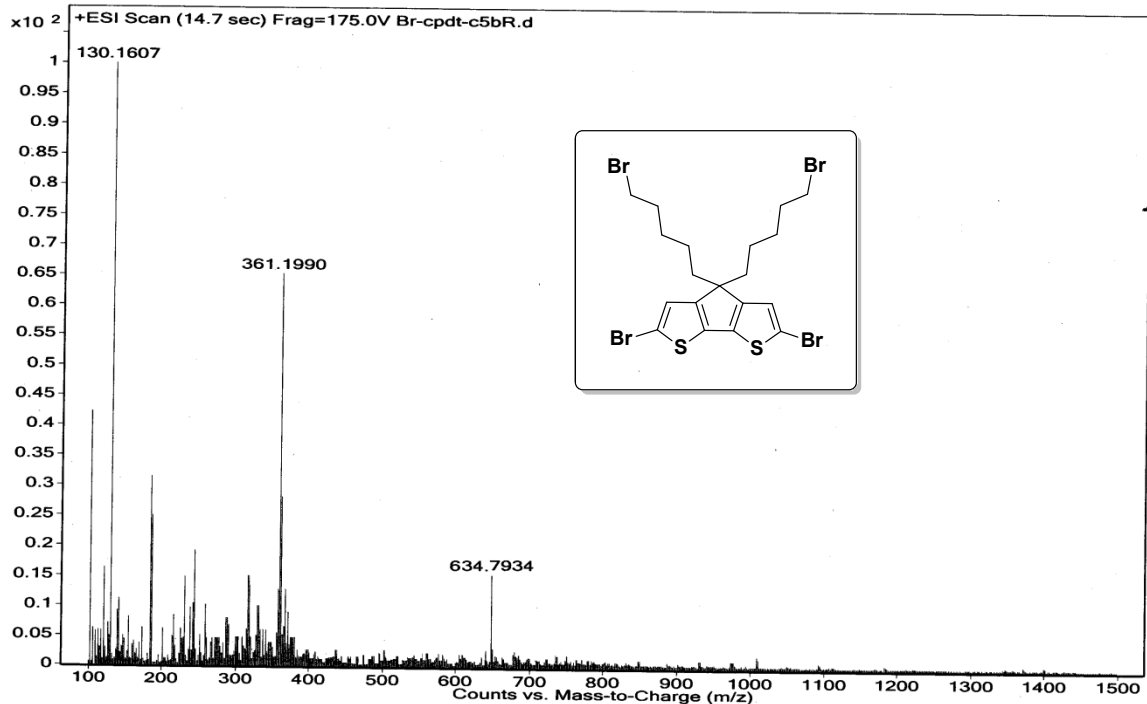

**Figure S39:** ESI-MS Spectrum of spectrum of 2,6-Dibromo-4,4'-bis(5-bromopentyl)-4H-cyclopenta[2,1-b:3,4-b']dithiophene (entry 1o).

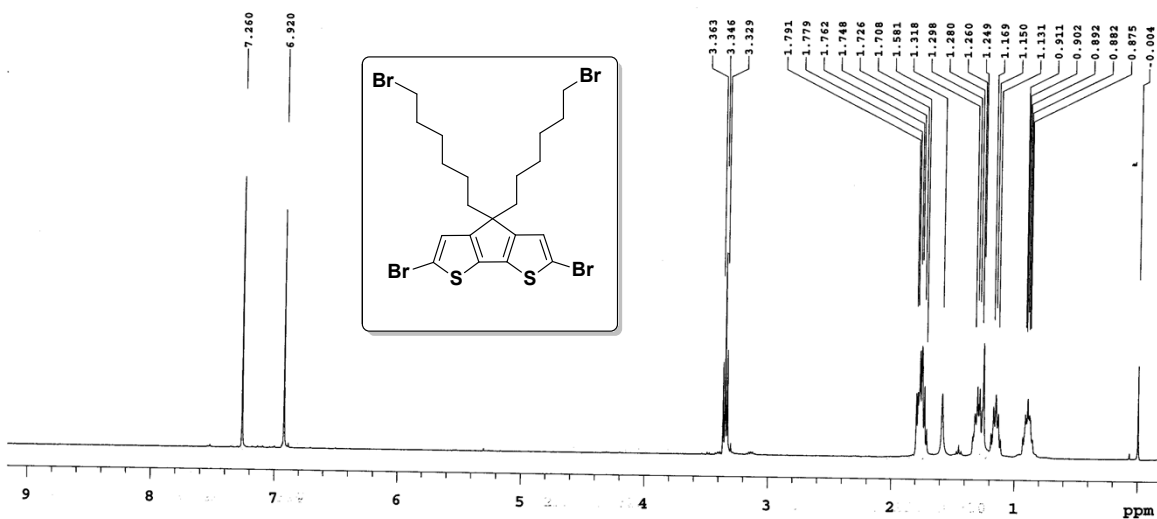

**Figure S40:**  $^1\text{H}$  NMR spectrum of 2,6-Dibromo-4,4'-bis(6-bromohexyl)-4H-cyclopenta[2,1-b:3,4-b']dithiophene (entry 1p).

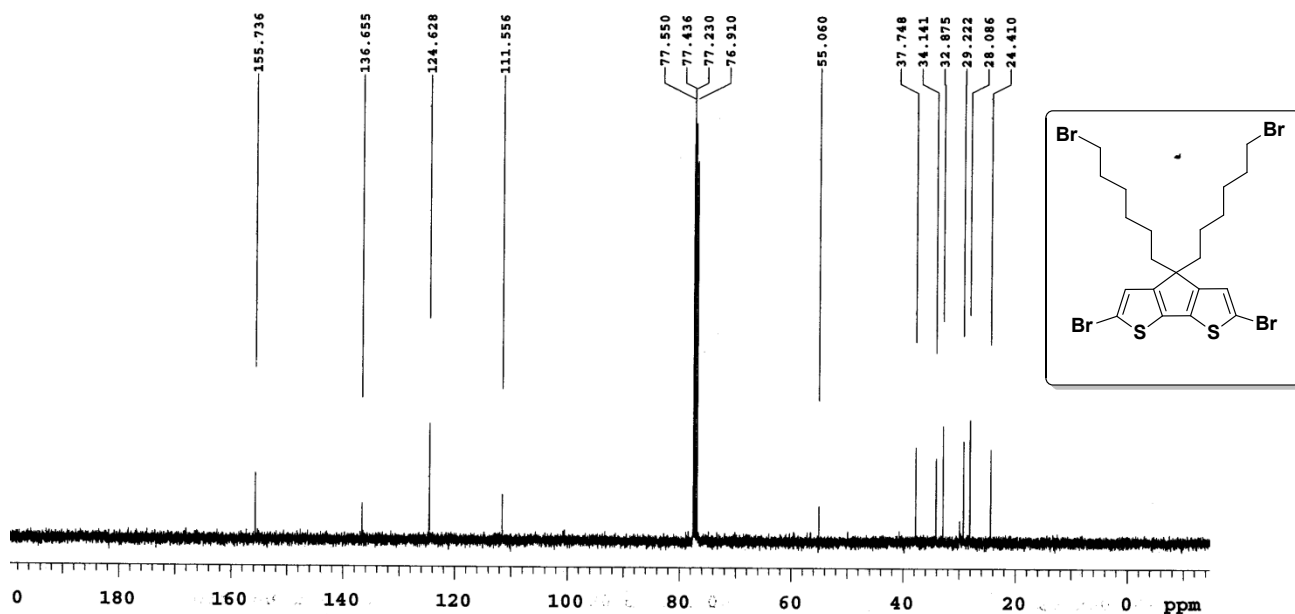

**Figure S41:**  $^{13}\text{C}$  NMR spectrum of 2,6-Dibromo-4,4'-bis(6-bromohexyl)-4*H*-cyclopenta[2,1-b:3,4-b']dithiophene (entry 1p).

| Sample Name   | Br-CPDT-C6-Br   | Position    | -1 | Instrument Name | Instrument 1 | User Name              |                       |
|---------------|-----------------|-------------|----|-----------------|--------------|------------------------|-----------------------|
| Inj Vol       | -10             | InjPosition |    | SampleType      | Sample       | IRM Calibration Status | Success               |
| Data Filename | Br-CPDT-C6-Br.d | ACQ Method  |    | Comment         |              | Acquired Time          | 8/19/2013 11:01:36 AM |

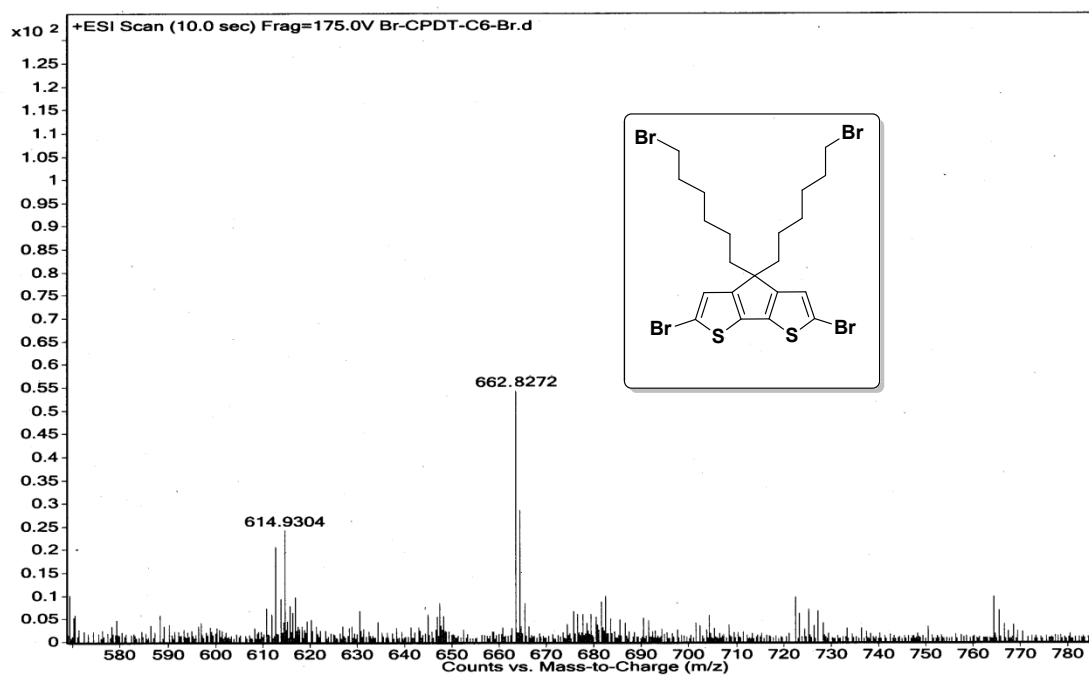

**Figure S42:** ESI-MS spectrum of 2,6-Dibromo-4,4'-bis(6-bromohexyl)-4*H*-cyclopenta[2,1-b:3,4-b']dithiophene (entry 1p).

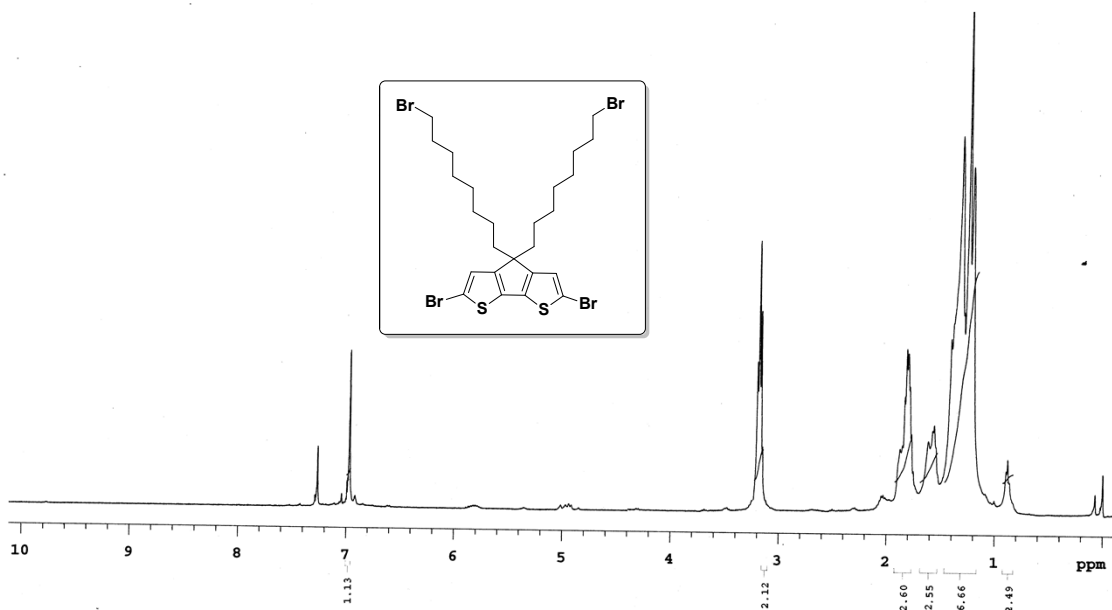

**Figure S43:**  $^1\text{H}$  NMR spectrum of 2,6-Dibromo-4,4'-bis(8-bromooctyl)-4*H*-cyclopenta[2,1-b:3,4-b']dithiophene (entry 1q).

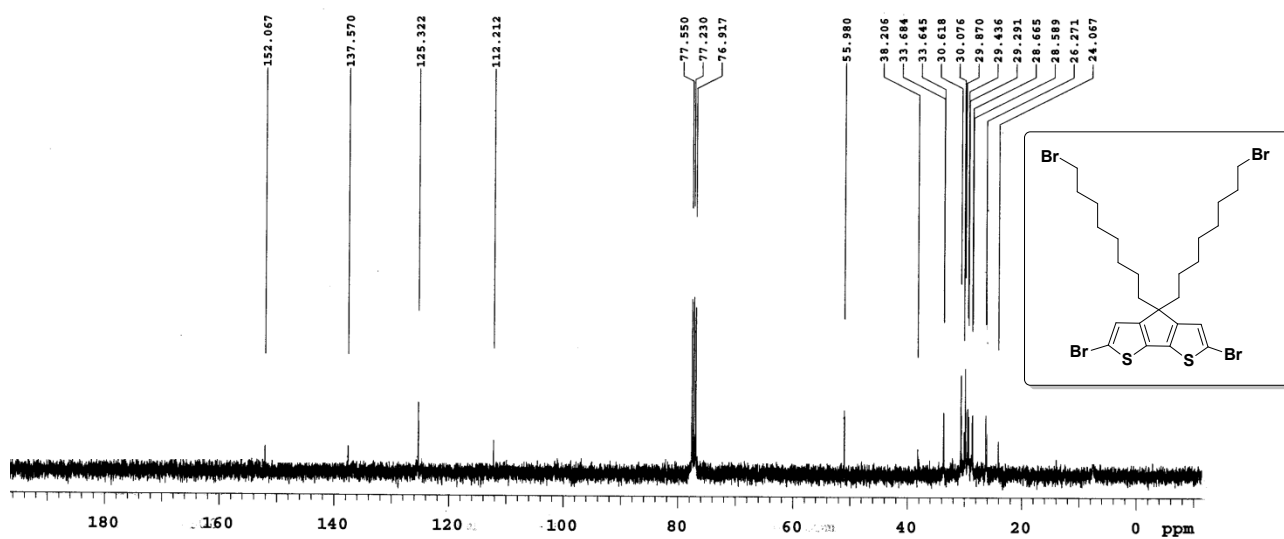

**Figure S44:**  $^{13}\text{C}$  NMR spectrum of 2,6-Dibromo-4,4'-bis(8-bromooctyl)-4*H*-cyclopenta[2,1-b:3,4-b']dithiophene (entry 1q).

|               |                 |             |    |                 |              |                        |                       |
|---------------|-----------------|-------------|----|-----------------|--------------|------------------------|-----------------------|
| Sample Name   | Br-CPDT-C8-Br   | Position    | -1 | Instrument Name | Instrument 1 | User Name              |                       |
| Inj Vol       | -10             | InjPosition |    | SampleType      | Sample       | IRM Calibration Status | Success               |
| Data Filename | Br-CPDT-C8-Br.d | ACQ Method  |    | Comment         |              | Acquired Time          | 8/19/2013 10:55:25 AM |

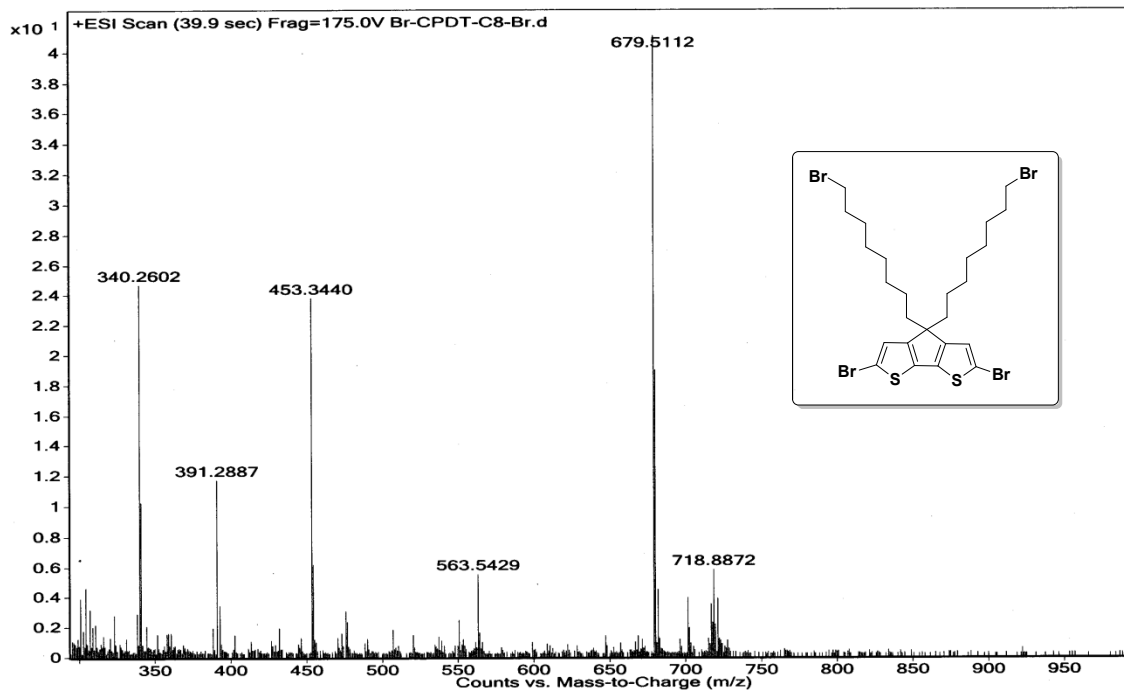

**Figure S45:** ESI-MS spectrum of 2,6-Dibromo-4,4'-bis(8-bromooctyl)-4H-cyclopenta[2,1-b:3,4-b']dithiophene (entry 1q).

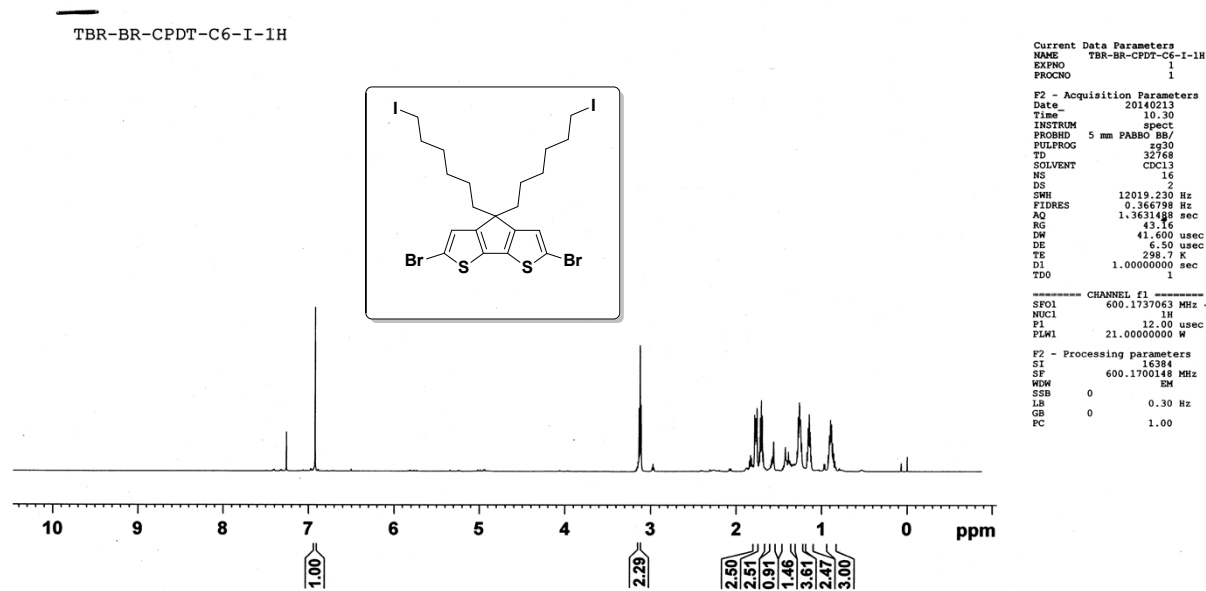

**Figure S46:**  $^1\text{H}$  NMR spectrum of 2,6-Dibromo-4,4'-bis(6-iodohexyl)-4H-cyclopenta[2,1-b:3,4-b']dithiophene (entry 1r).



TBR-BR-CPDT-C6-I-13C

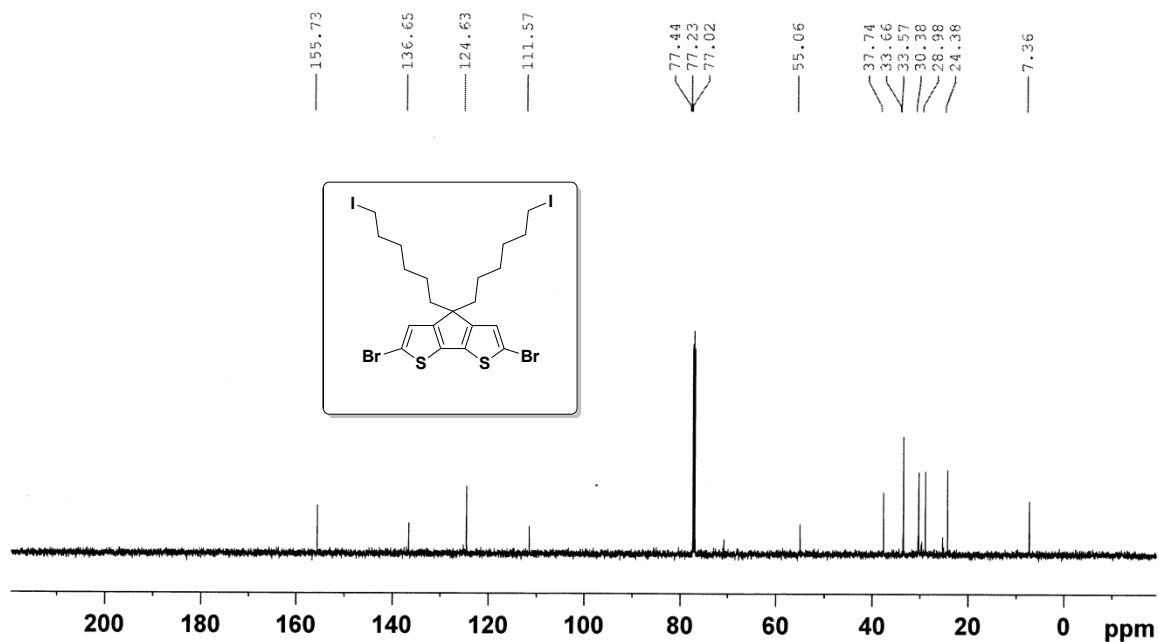

**Figure S47:**  $^{13}\text{C}$  NMR spectrum of 2,6-Dibromo-4,4'-bis(6-iodohexyl)-4*H*-cyclopenta[2,1-b:3,4-b']dithiophene (entry 1r).

|               |                      |             |    |                 |              |                        |                     |
|---------------|----------------------|-------------|----|-----------------|--------------|------------------------|---------------------|
| Sample Name   | TBR-4-Br-CPDT-C6-I   | Position    | -1 | Instrument Name | Instrument 1 | User Name              |                     |
| Inj Vol       | -10                  | InjPosition |    | SampleType      | Sample       | IRM Calibration Status | Success             |
| Data Filename | TBR-4-Br-CPDT-C6-I.d | ACQ Method  |    | Comment         |              | Acquired Time          | 3/4/2014 2:17:44 PM |

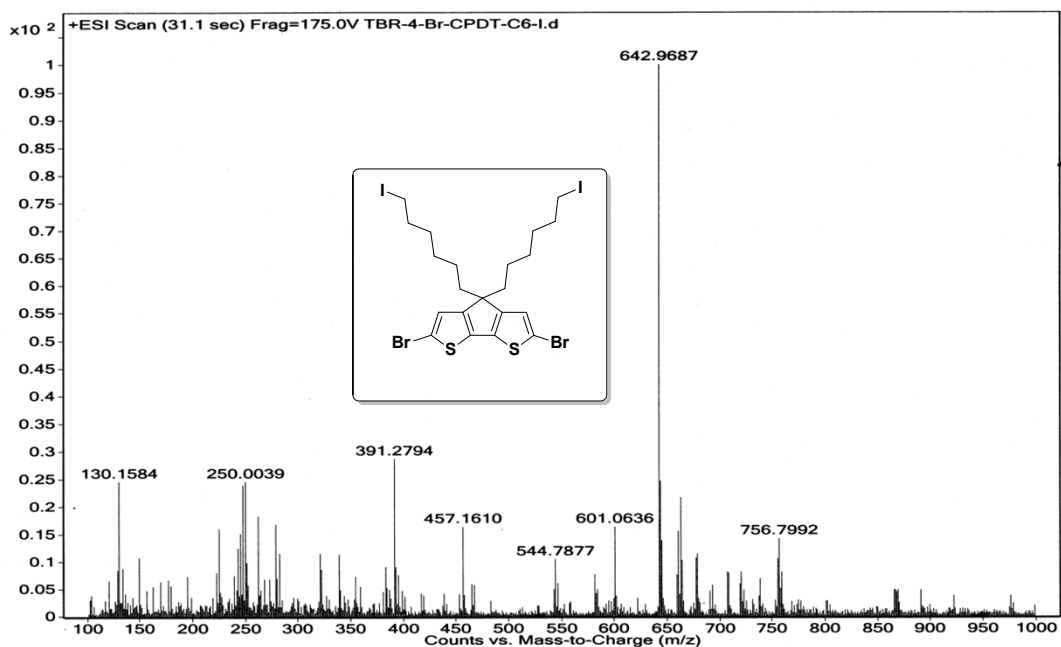

**Figure S48:** ESI-MS spectrum of 2,6-Dibromo-4,4'-bis(6-iodohexyl)-4*H*-cyclopenta[2,1-b:3,4-b']dithiophene (entry 1r).

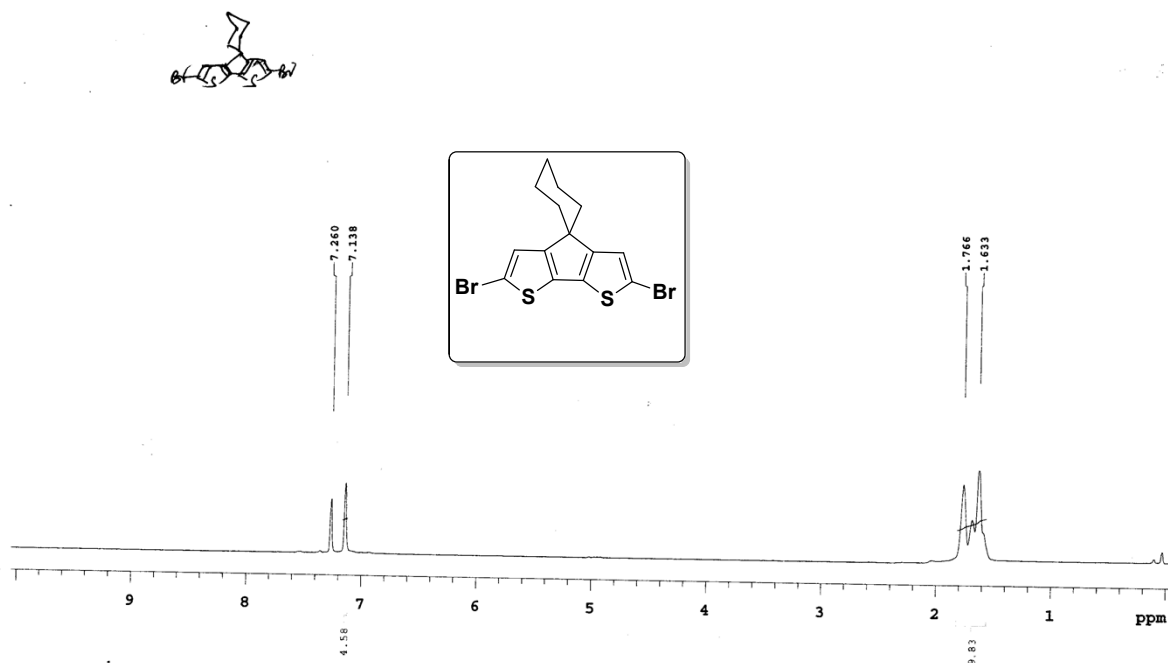

**Figure S49:** <sup>1</sup>H NMR spectrum of 2,6-Dibromo spiro[4,5] ([2,1-b; 3,4-b']dithieno)decane.

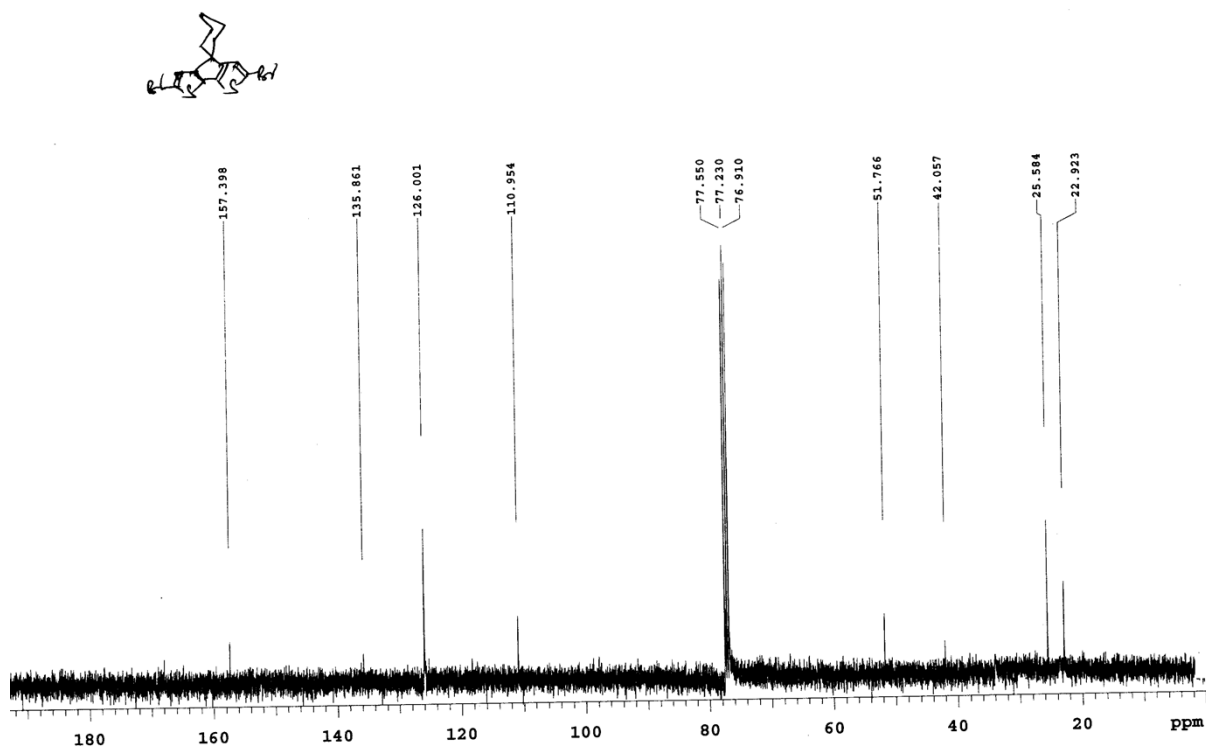

**Figure S50:** <sup>13</sup>C NMR spectrum of 2,6-Dibromo spiro[4,5] ([2,1-b; 3,4-b']dithieno)decane.

**Crystal Data**

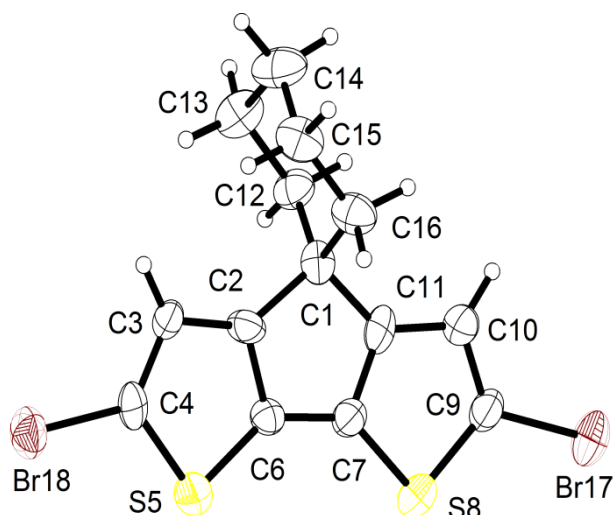

**Figure S51.** ORTEP diagram of 2,6-Dibromo spiro[4,5] ([2,1-b; 3,4-b']dithieno)decane

**Crystal Data and Structure Refinement for TBr-Brcpdb-C5br at 296(2) K**

**Crystallographic parameters of 2,6-Dibromo spiro[4,5] ([2,1-b; 3,4-b']dithieno)decane**

|                                        |                                                                |
|----------------------------------------|----------------------------------------------------------------|
| Compound                               | TBr-Brcpdb-C5br                                                |
| Formula                                | C <sub>14</sub> H <sub>12</sub> Br <sub>2</sub> S <sub>2</sub> |
| CCDC NO                                | 1005162                                                        |
| Formula. wt.                           | 404.18                                                         |
| Crystal system                         | Monoclinic                                                     |
| Space group                            | P 21/c                                                         |
| <i>a</i> (Å)                           | 6.5657(4)                                                      |
| <i>b</i> (Å)                           | 15.4051(8)                                                     |
| <i>c</i> (Å)                           | 14.3212(7)                                                     |
| α(°)                                   | 90                                                             |
| β(°)                                   | 100.183(5)                                                     |
| γ(°)                                   | 90                                                             |
| V/ Å <sup>3</sup>                      | 1425.71(14)                                                    |
| Z                                      | 4                                                              |
| Density/Mgm <sup>-3</sup>              | 1.883                                                          |
| Abs. Coeff/mm <sup>-1</sup>            | 5.957                                                          |
| F(000)                                 | 792                                                            |
| Total no. of reflections               | 5206                                                           |
| Reflections, <i>I</i> > 2σ( <i>I</i> ) | 1578                                                           |
| Max. 2θ/°                              | 6.02 to 57.2°                                                  |
| Ranges (h, k, l)                       | -7 ≤ h ≤ 7,<br>-16 ≤ k ≤ 18,<br>-16 ≤ l ≤ 17                   |
| Complete to 2θ (%)                     | 1.00                                                           |
| Data/<br>Restraints/Parameters         | 2507/0/163                                                     |
| Goof ( <i>F</i> <sub>2</sub> )         | 1.026                                                          |

|                                   |        |
|-----------------------------------|--------|
| R indices [ $I \geq 2\sigma(I)$ ] | 0.0631 |
| R indices (all data)              | 0.1046 |
